# Supplementary material for: Combination of short-read, long-read, and optical mapping assemblies reveals large-scale tandem repeat arrays with population genetic implications
Source: PubMed Central journal article supplement — Genome Res. 2017 May;27(5):697–708. doi: 10.1101/gr.215095.116 (PMC5411765; doi:10.1101/gr.215095.116), 2017-05

**Supplemental Figure S5: Chromosome-level distribution of population-scaled recombination rate  $\rho$  and structural genome features.** Black dots correspond to  $\rho$ /bp in 50-kb windows estimated from a Swedish hooded crow population. Grey lines indicate scaffold ends, red circles denote a repetitive anchored map (RAM), orange squares the occurrence of the crowSat1 satellite. Data is shown for all synteny-based chromosomal reconstructions >5 Mb except for those depicted in Fig. 3.

# chr1A

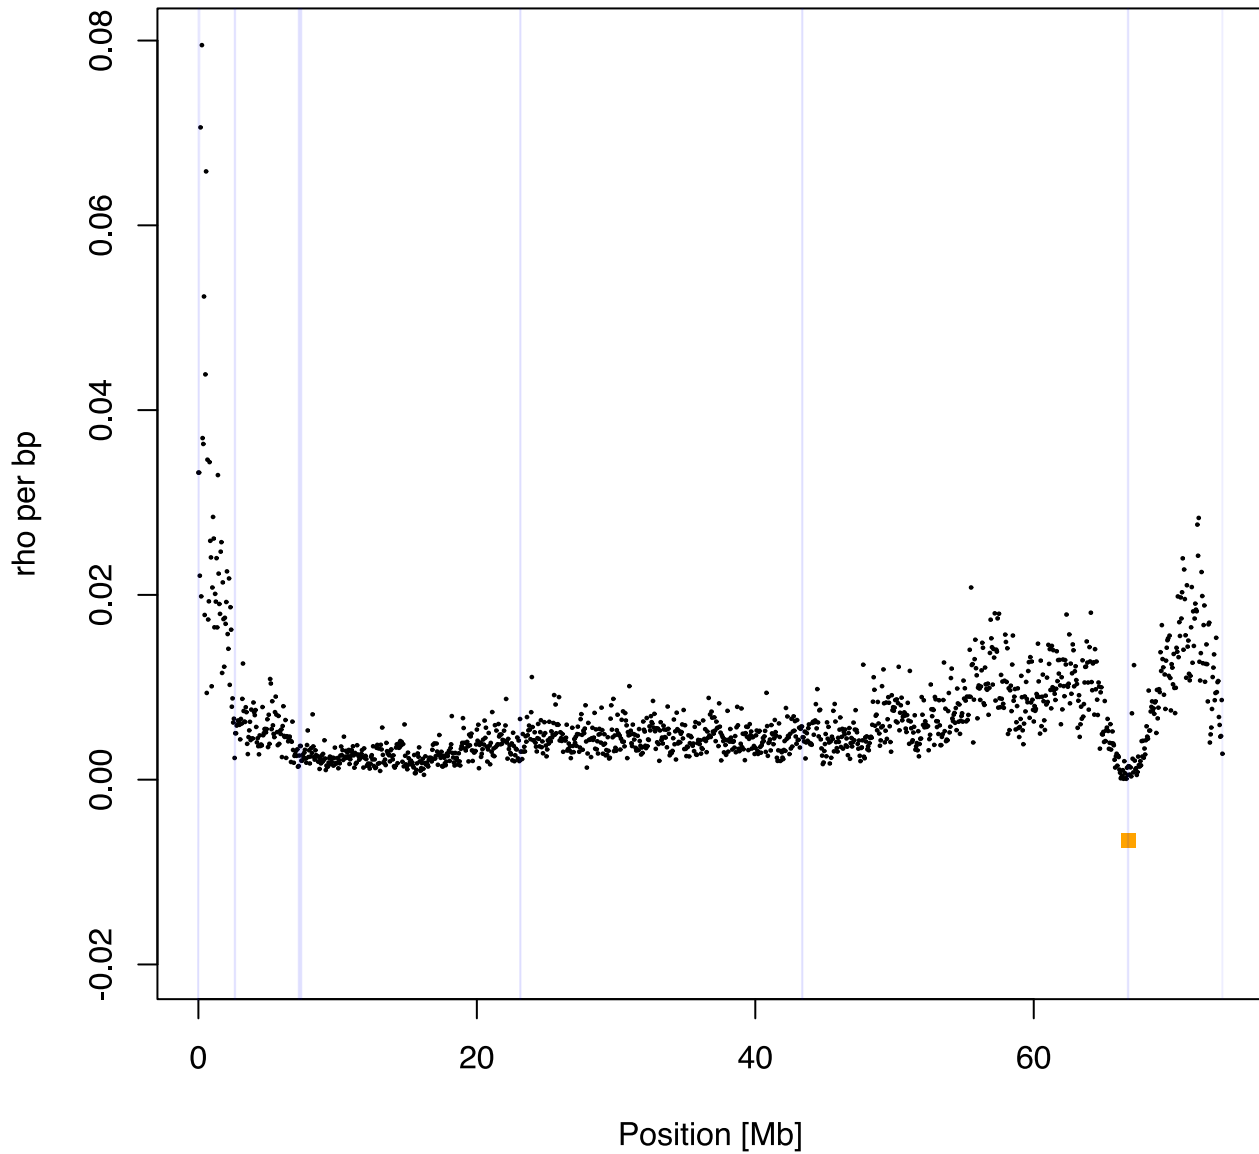

chr2

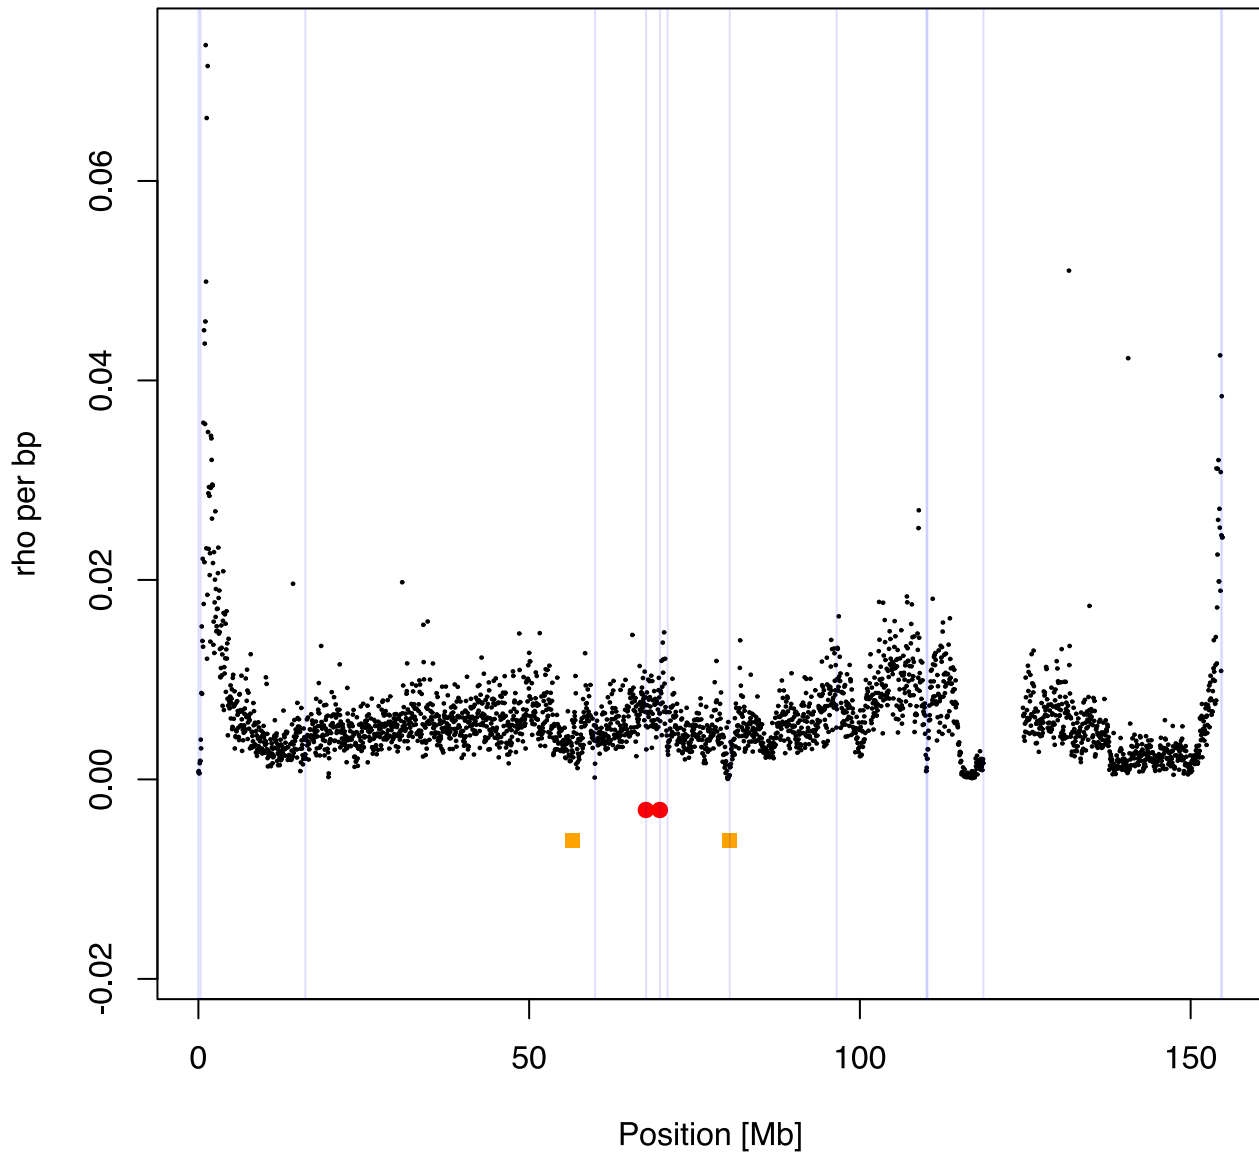

# chr3

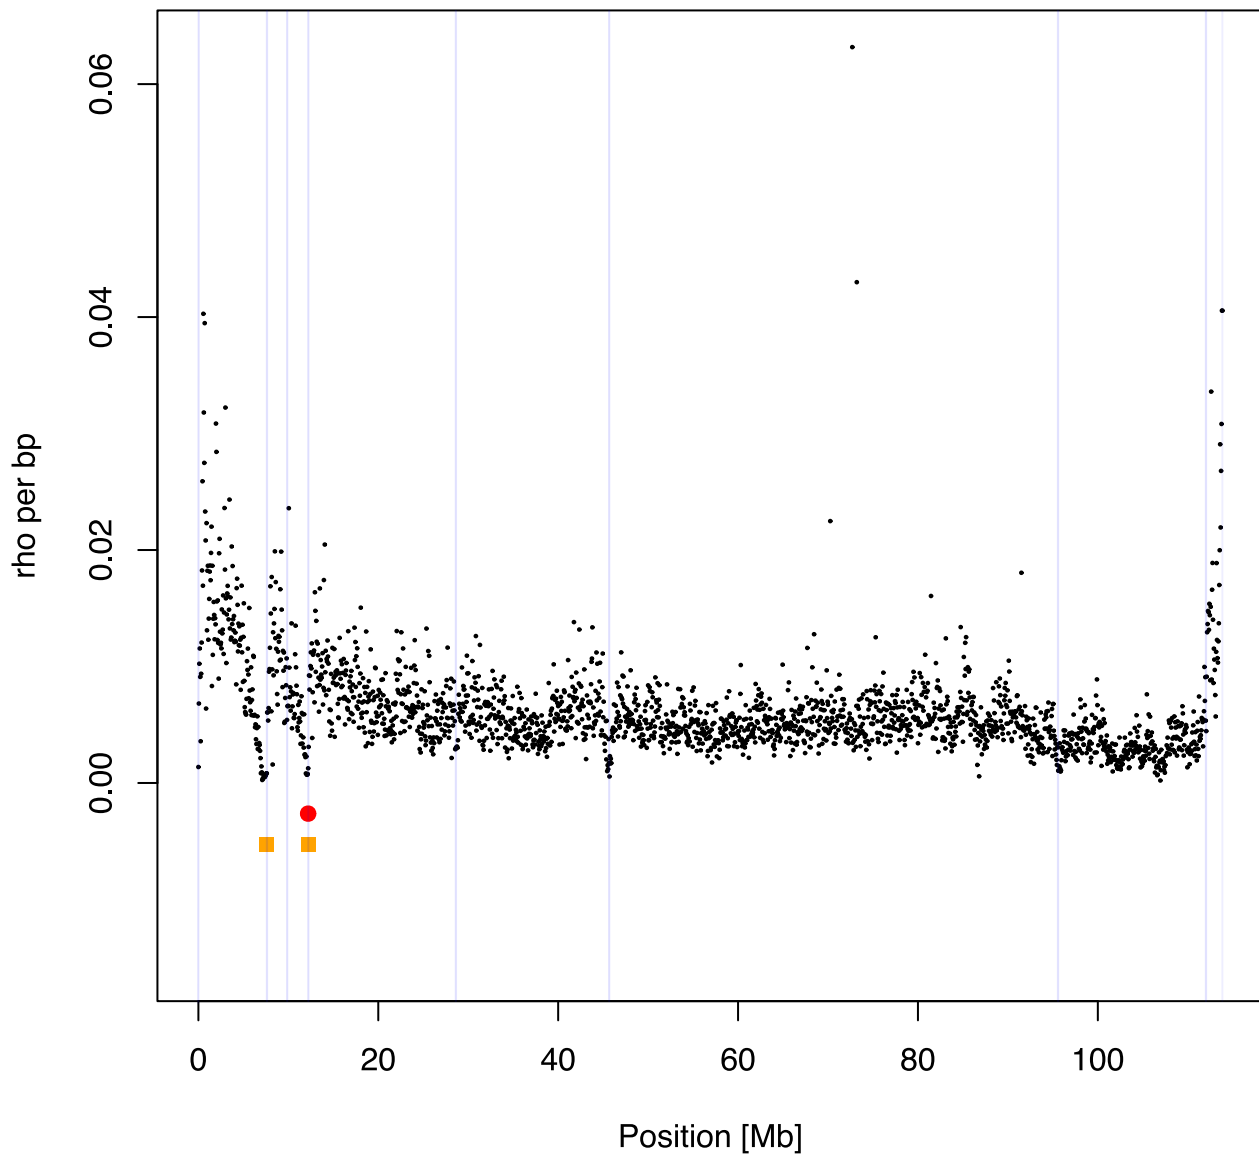

# chr4

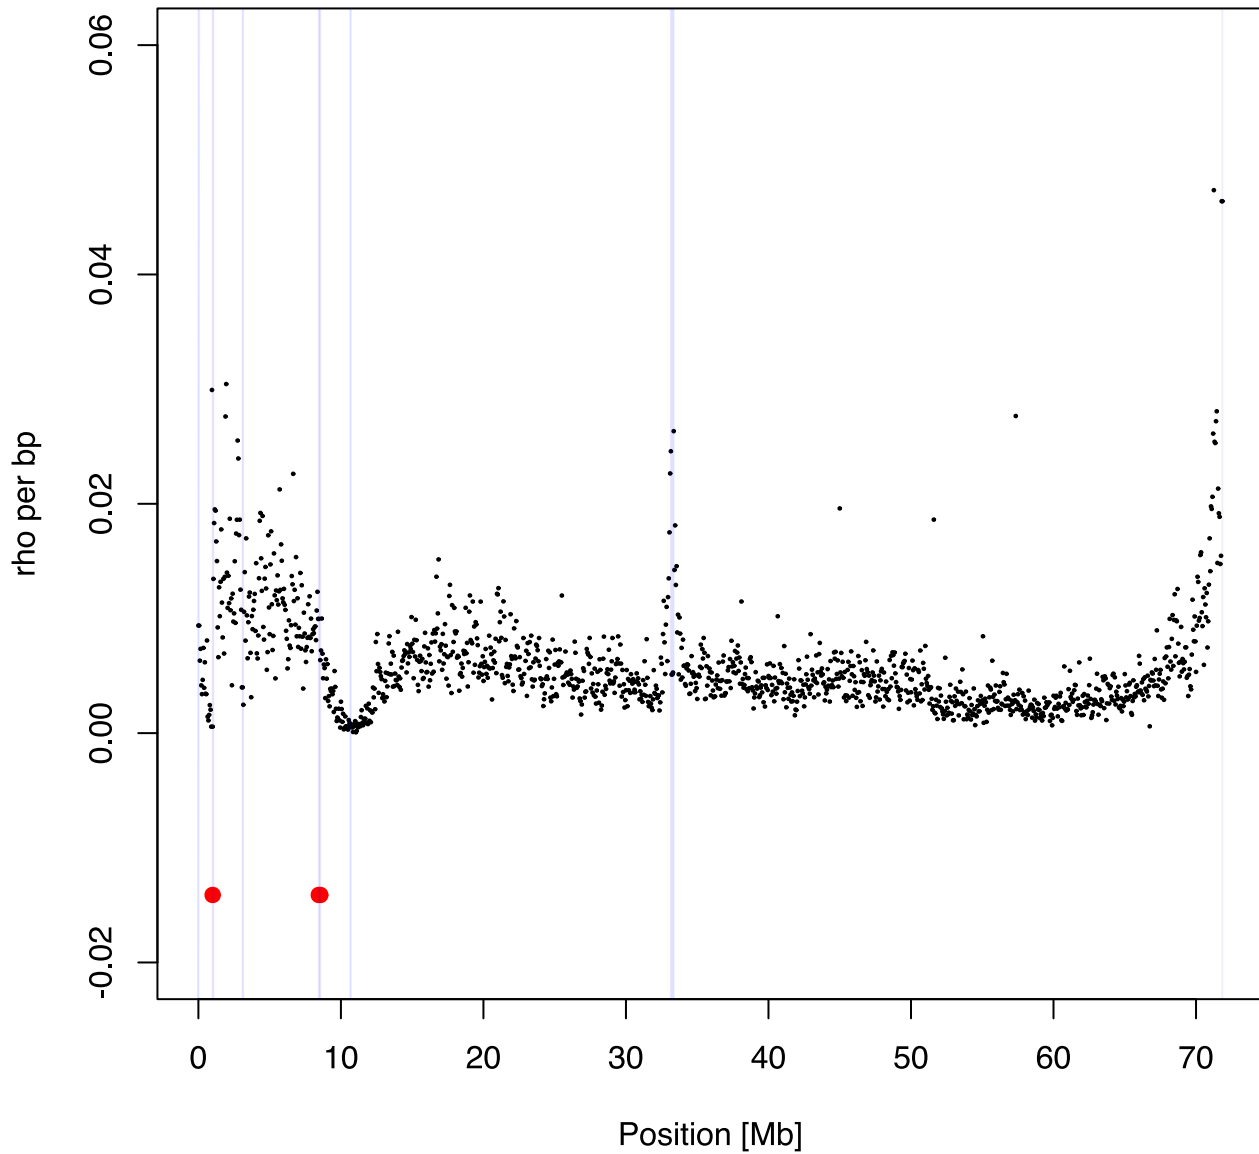

# chr4A

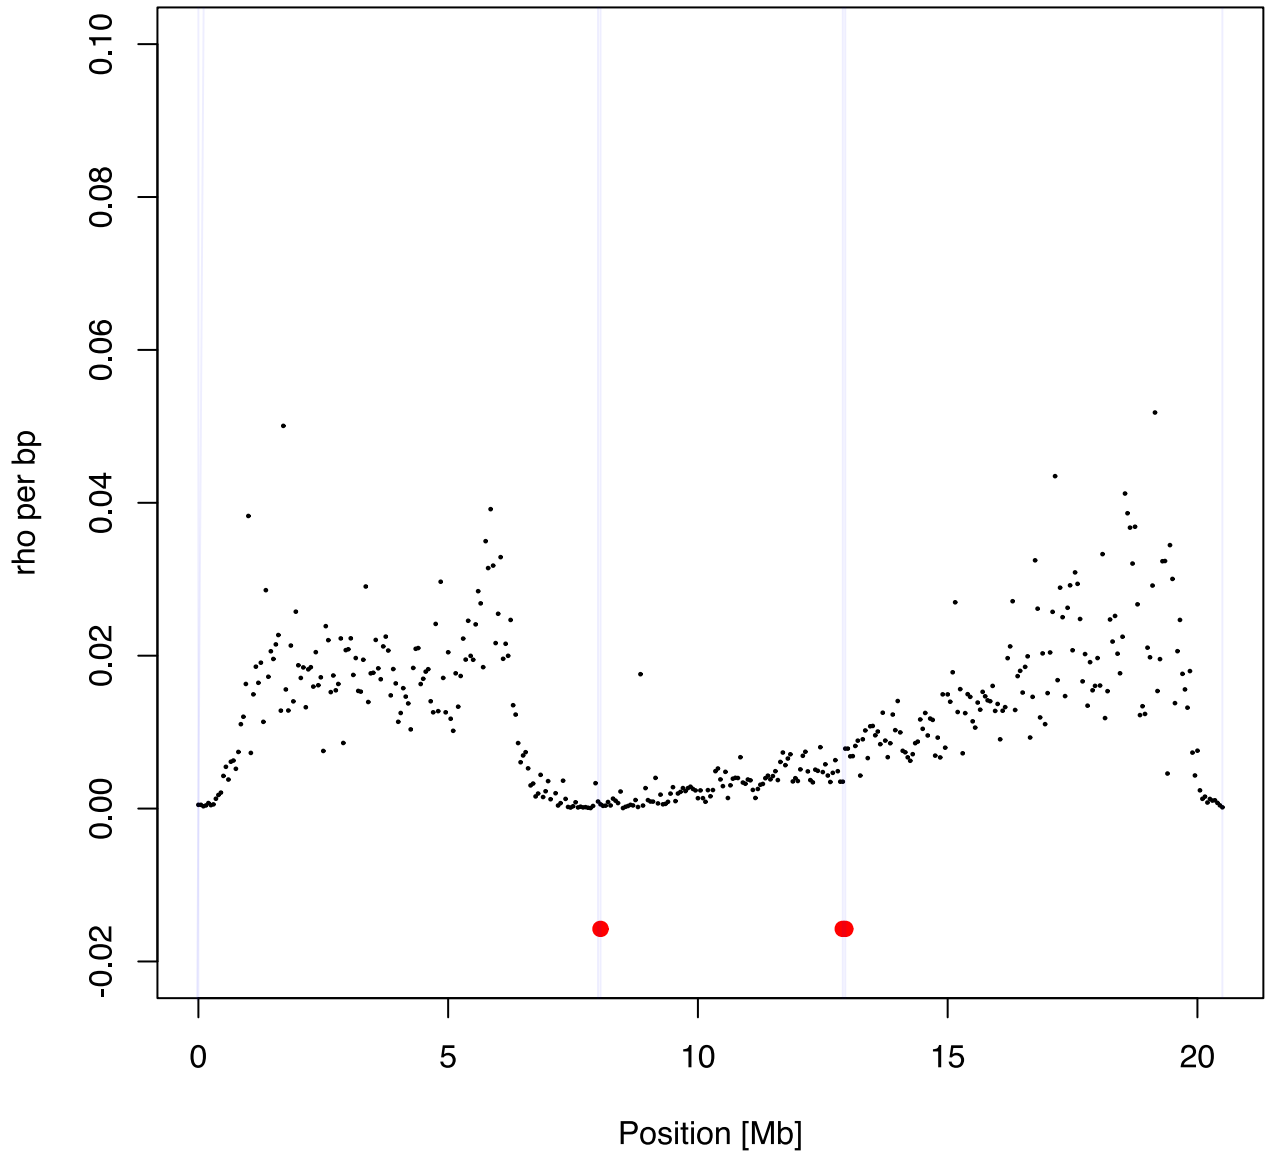

# chr5

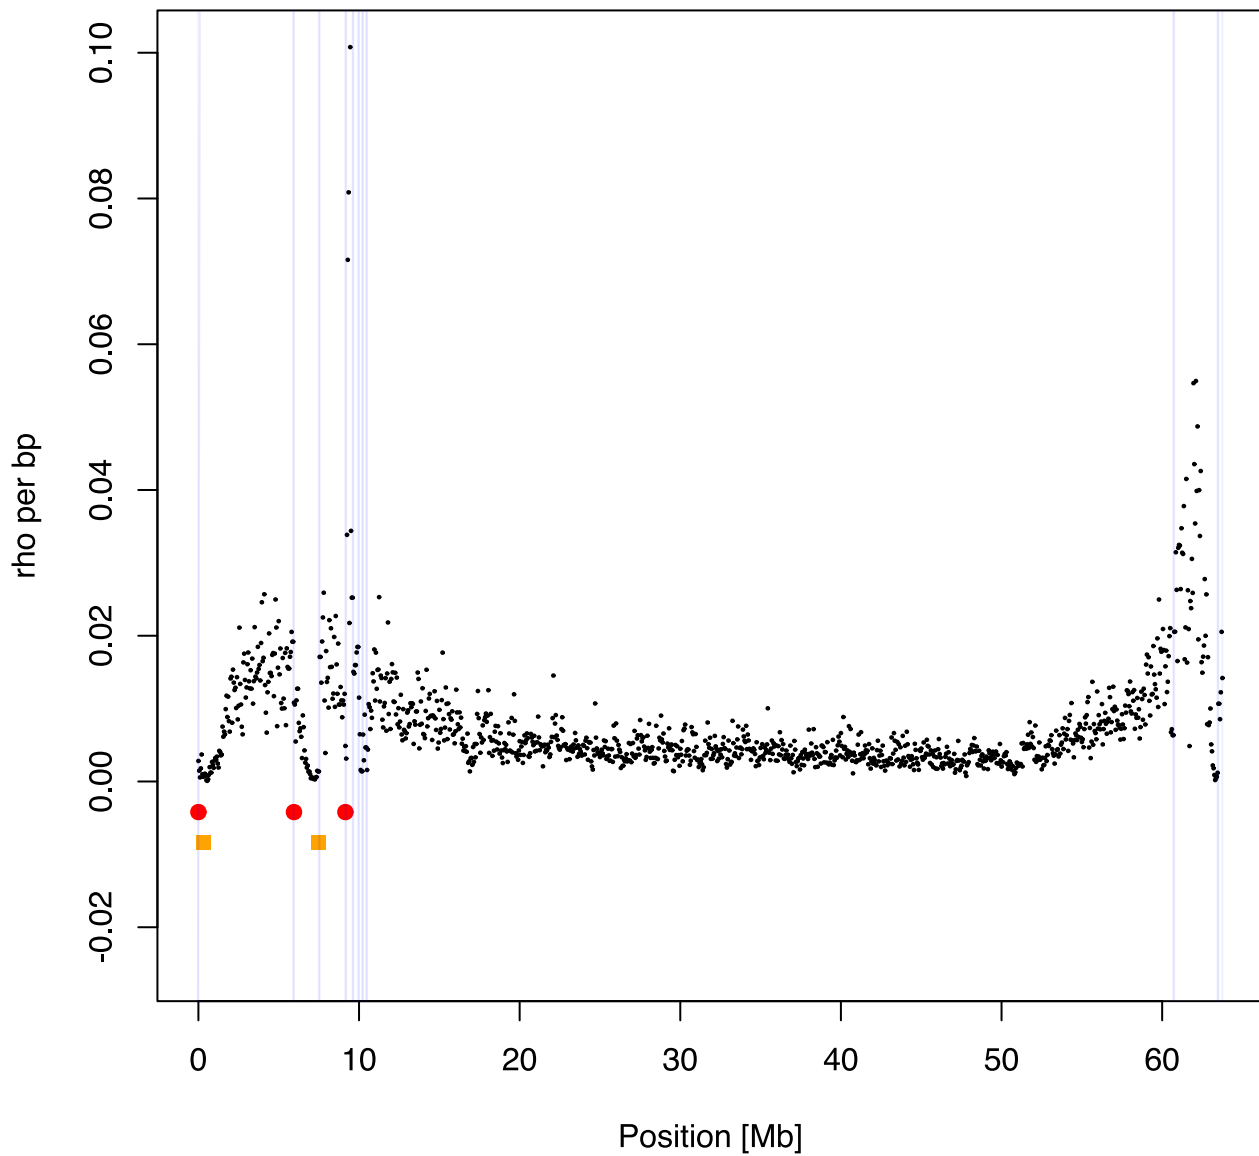

chr7

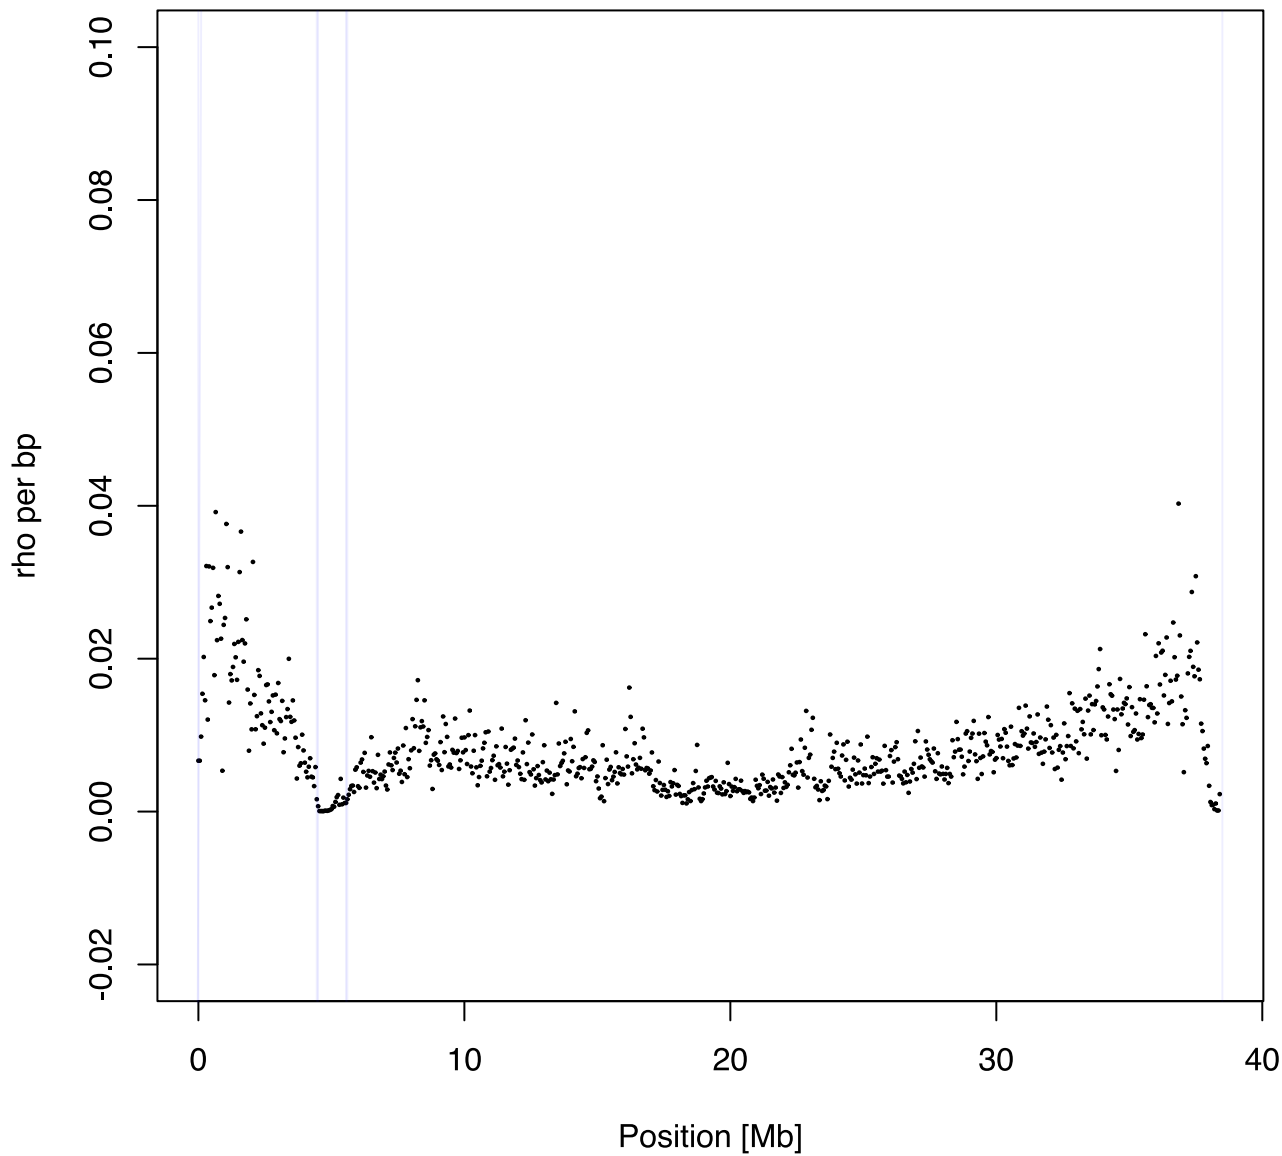



chr8

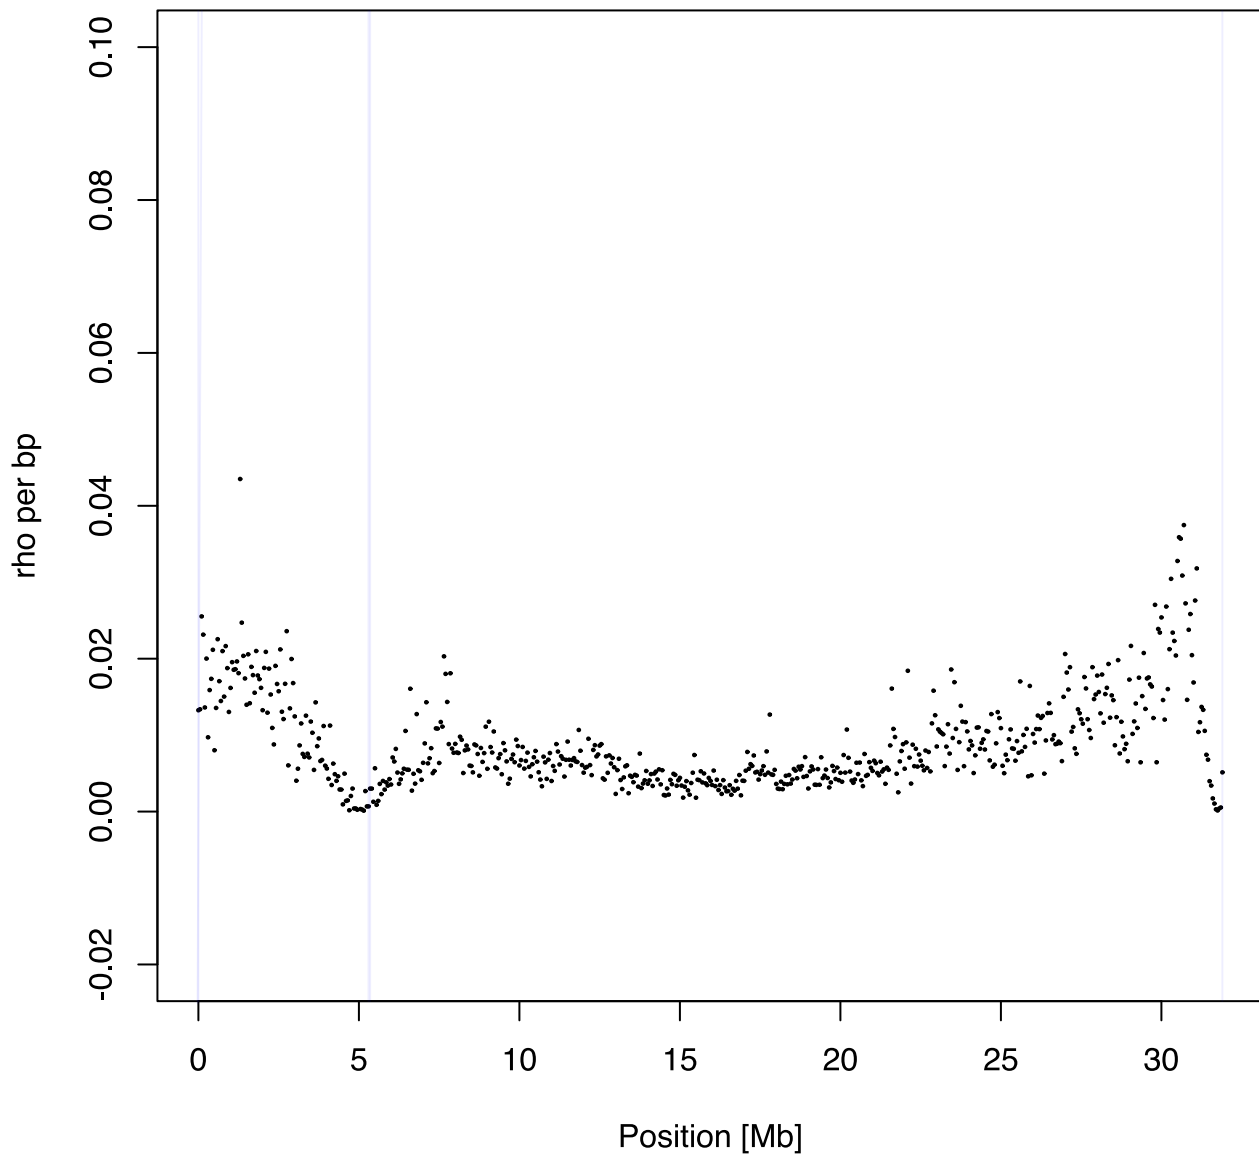

# chr9

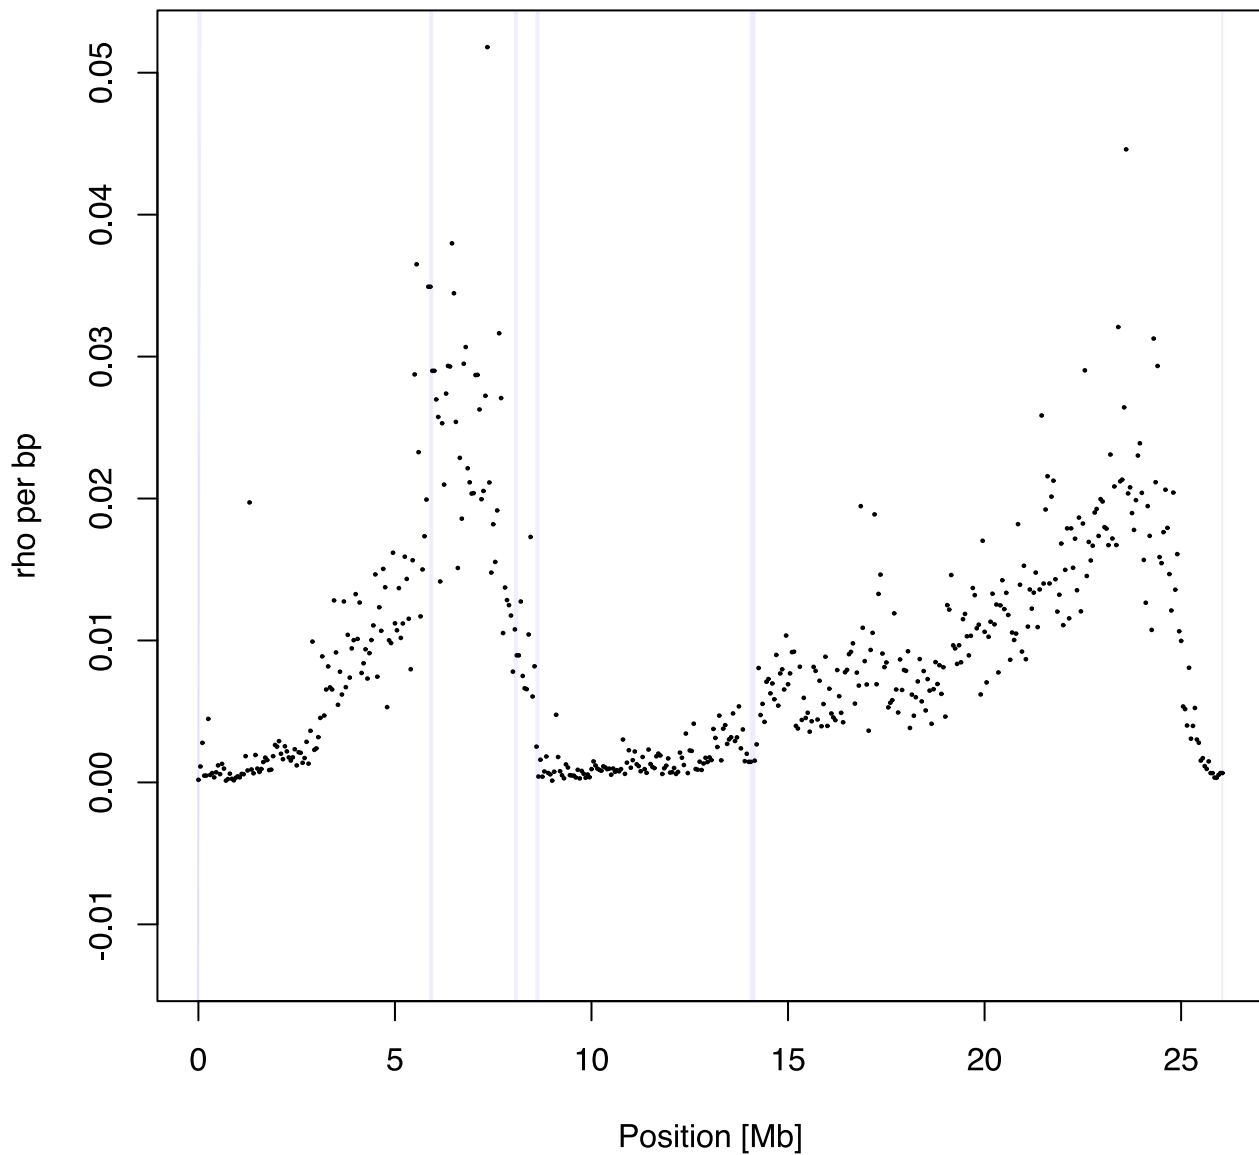

# chr10

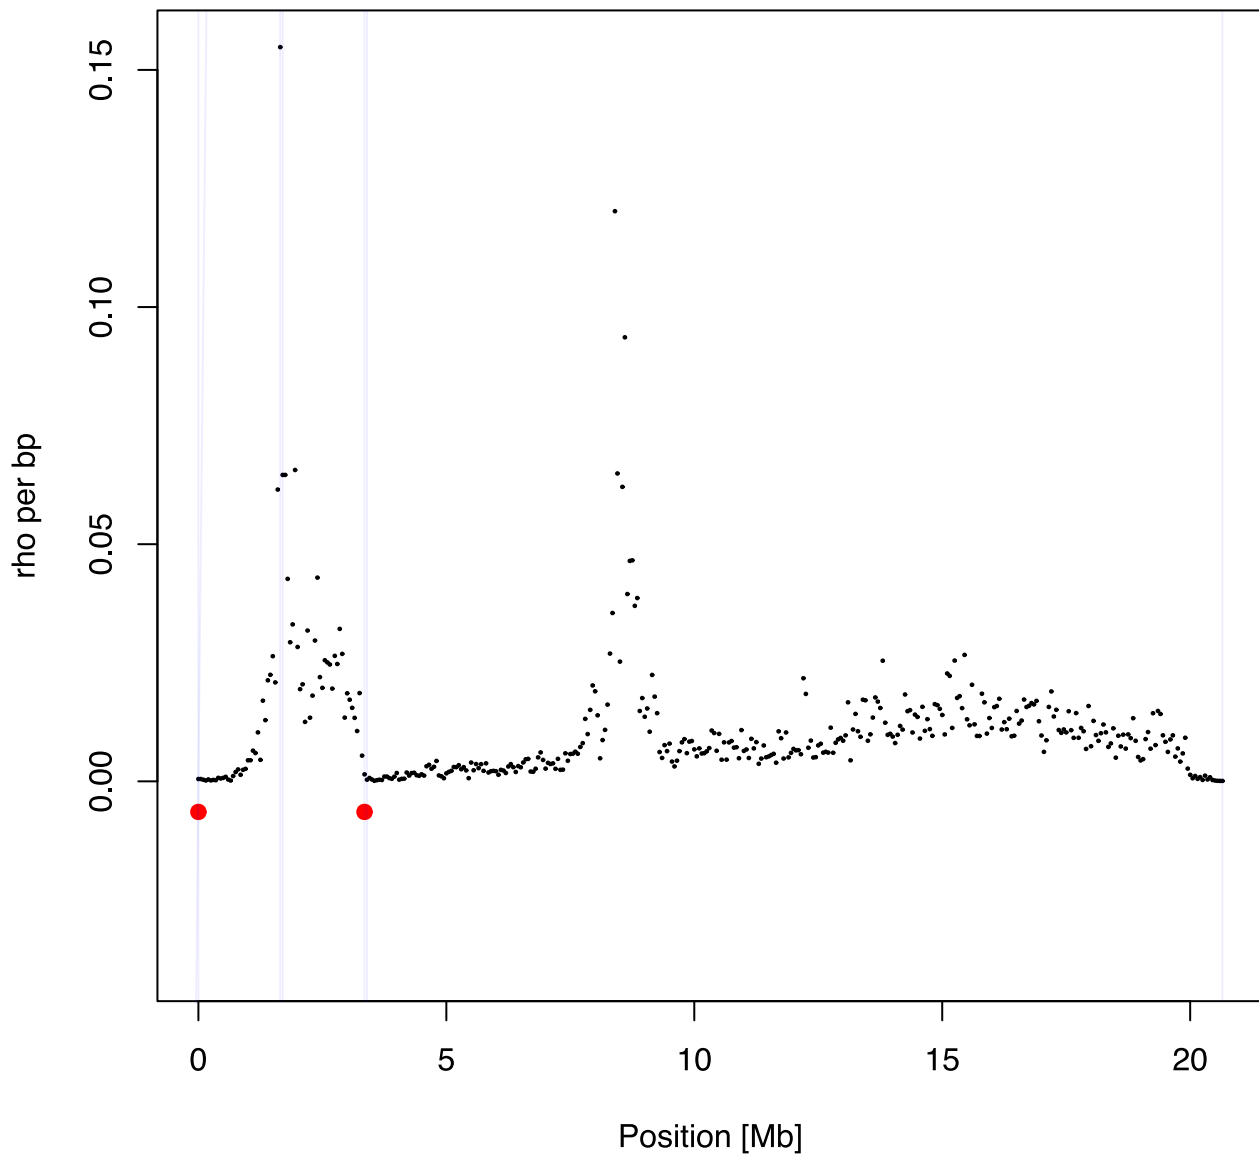

# chr11

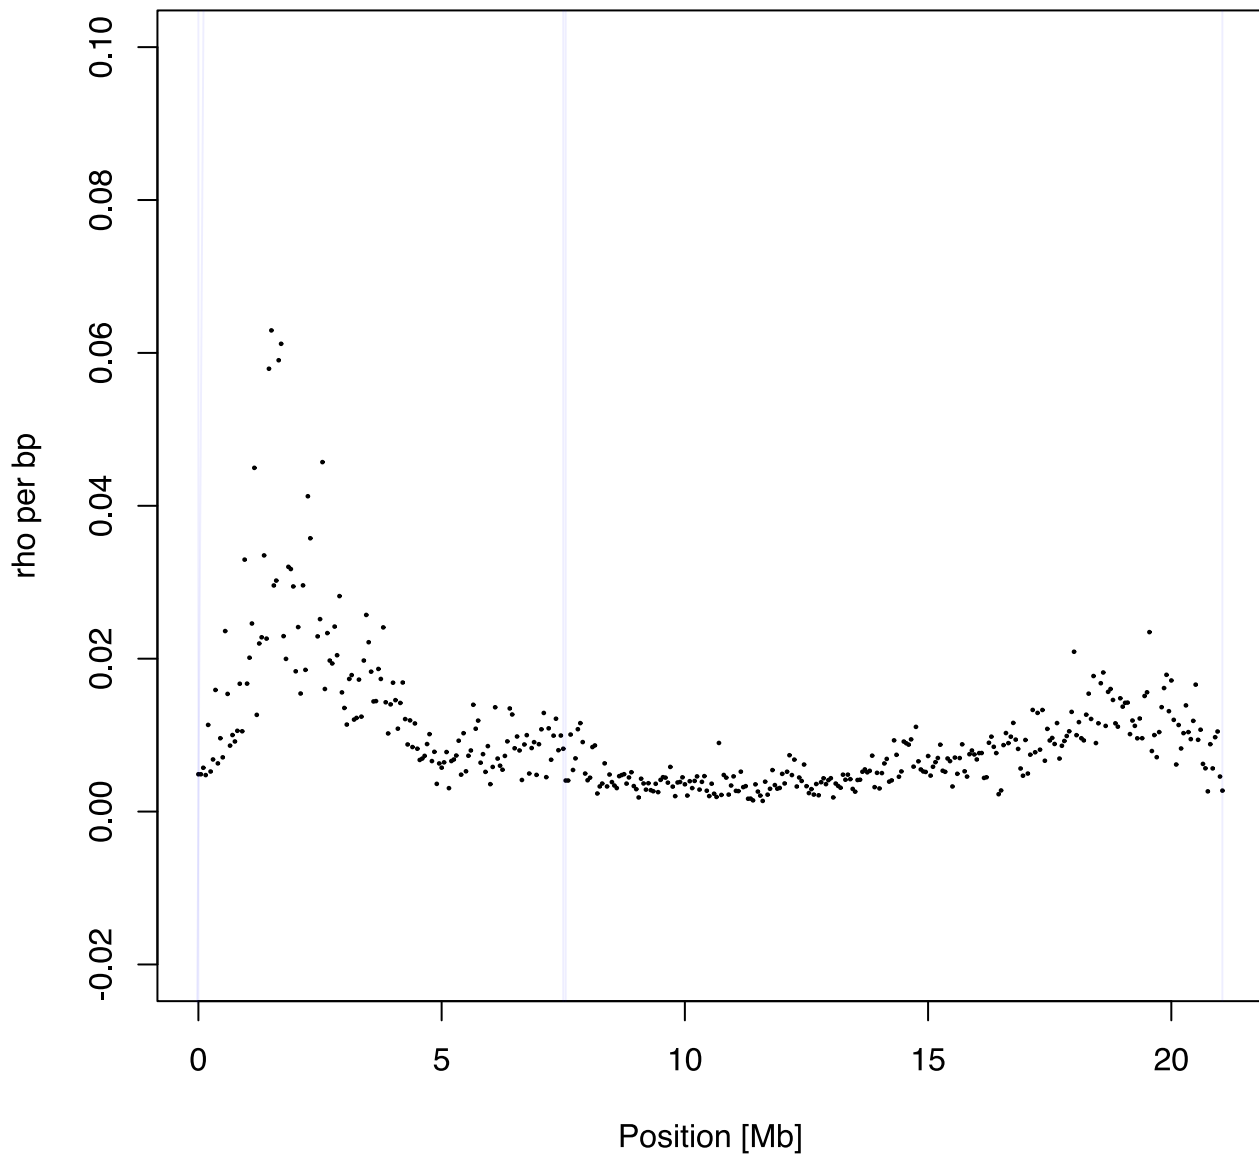

# chr12

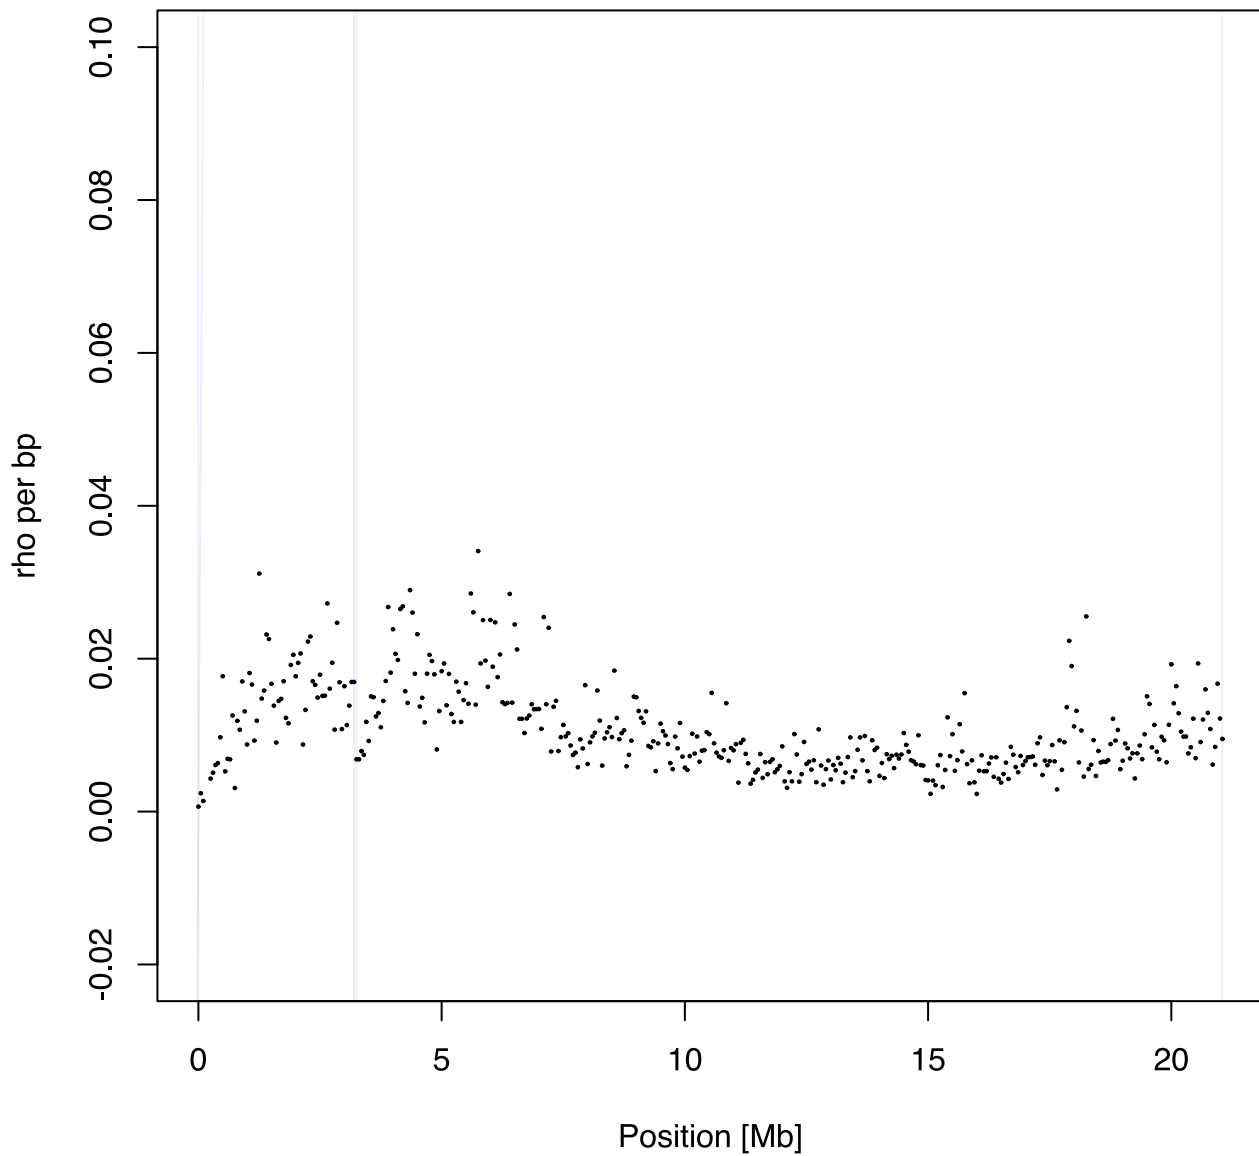

# chr14

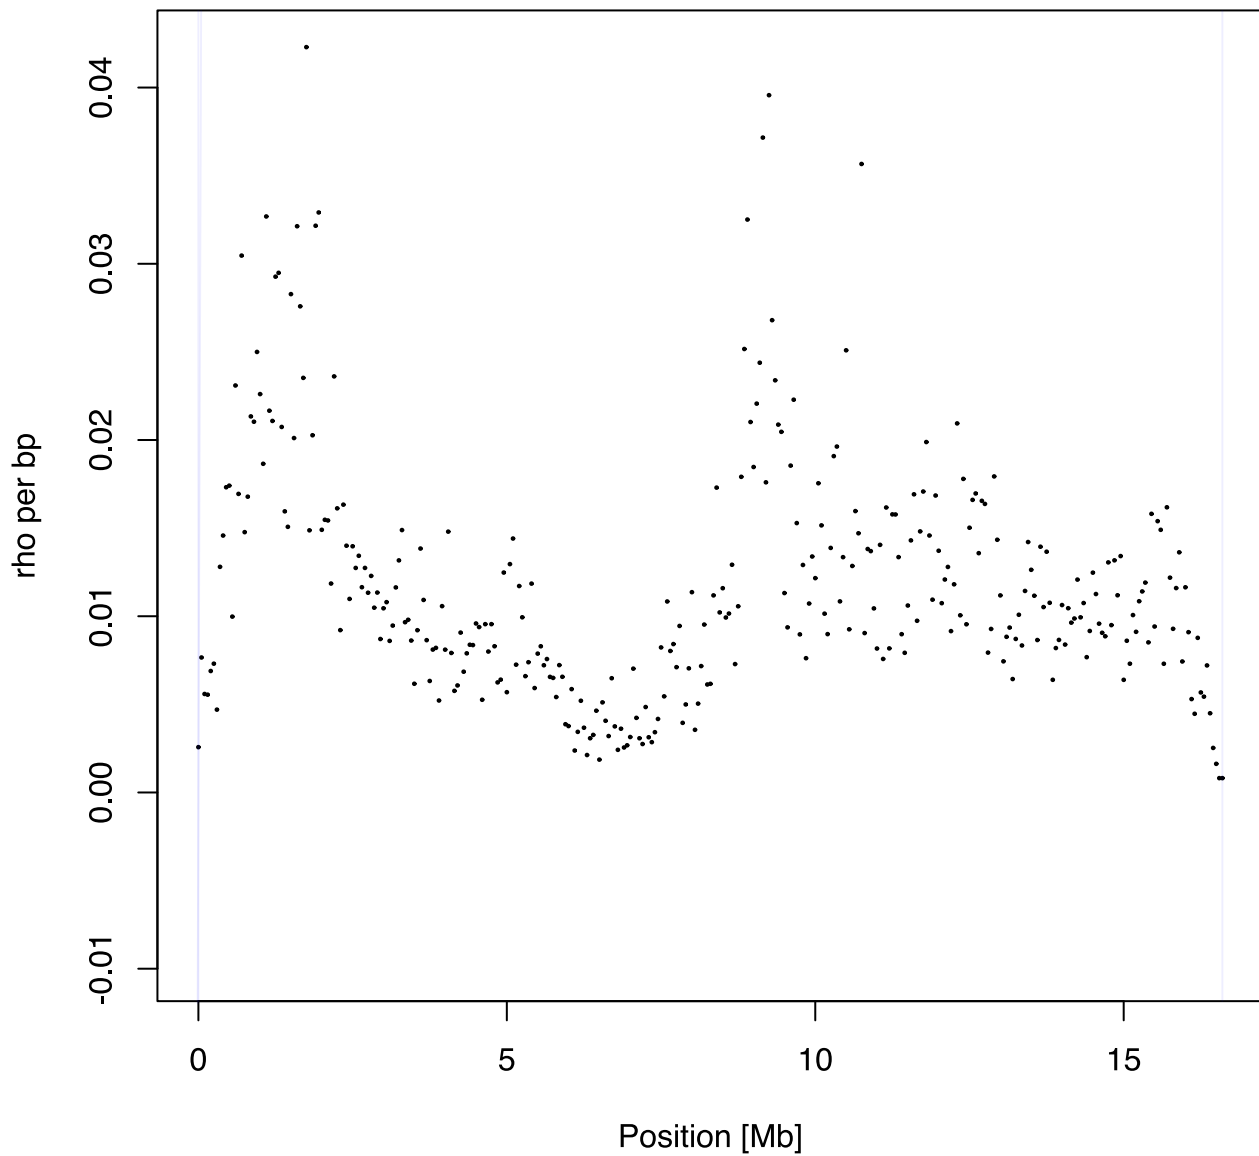

# chr15

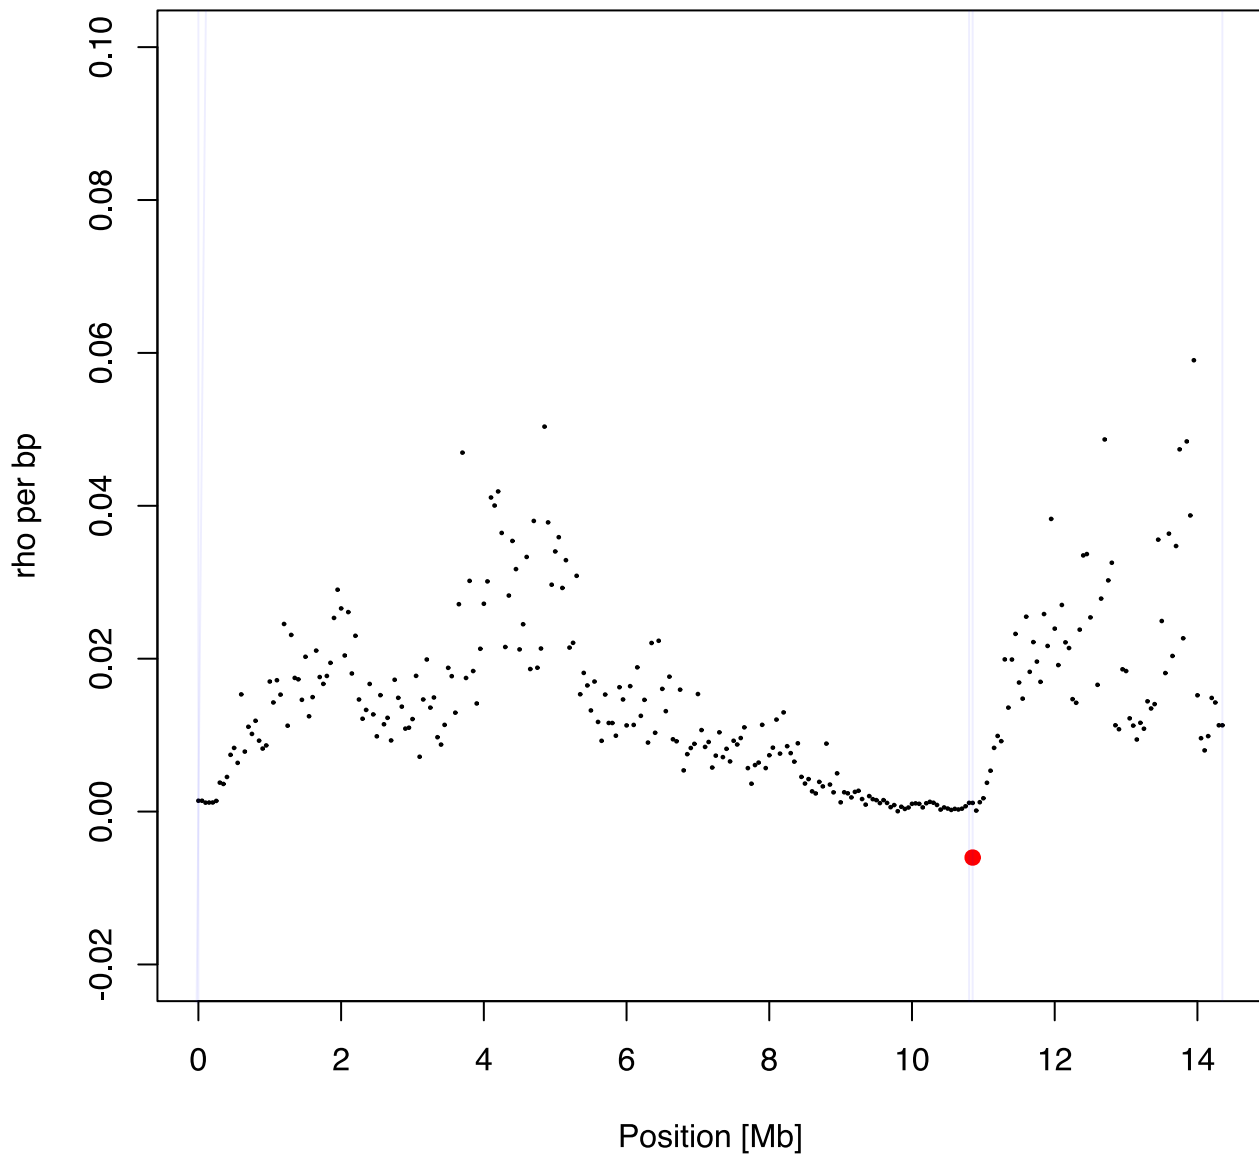

# chr17

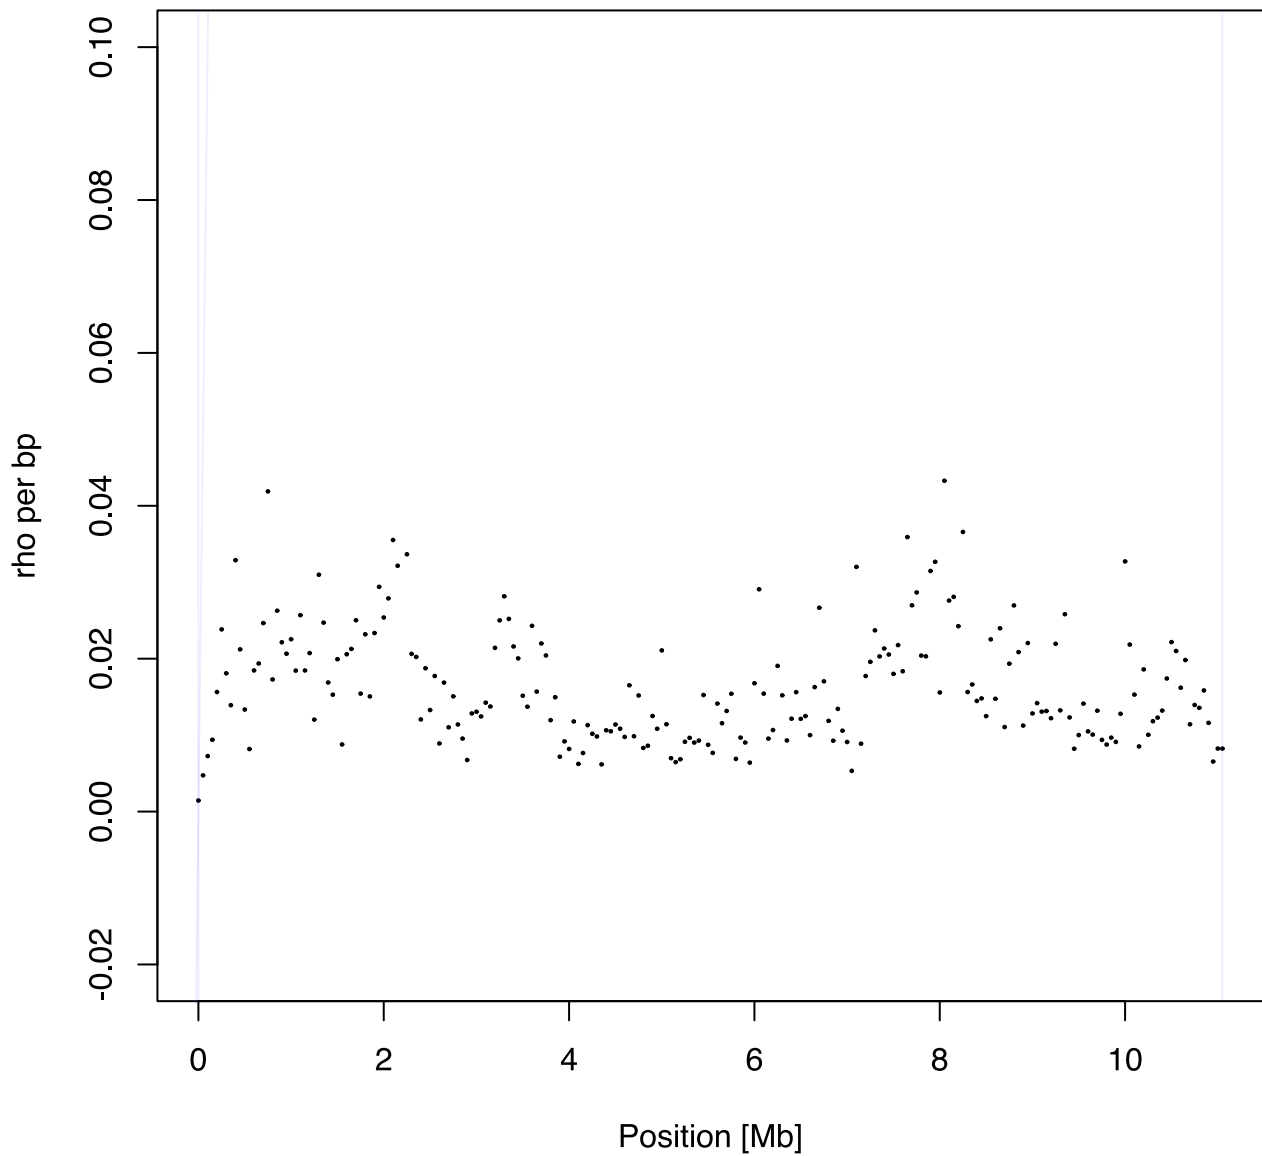



# chr19

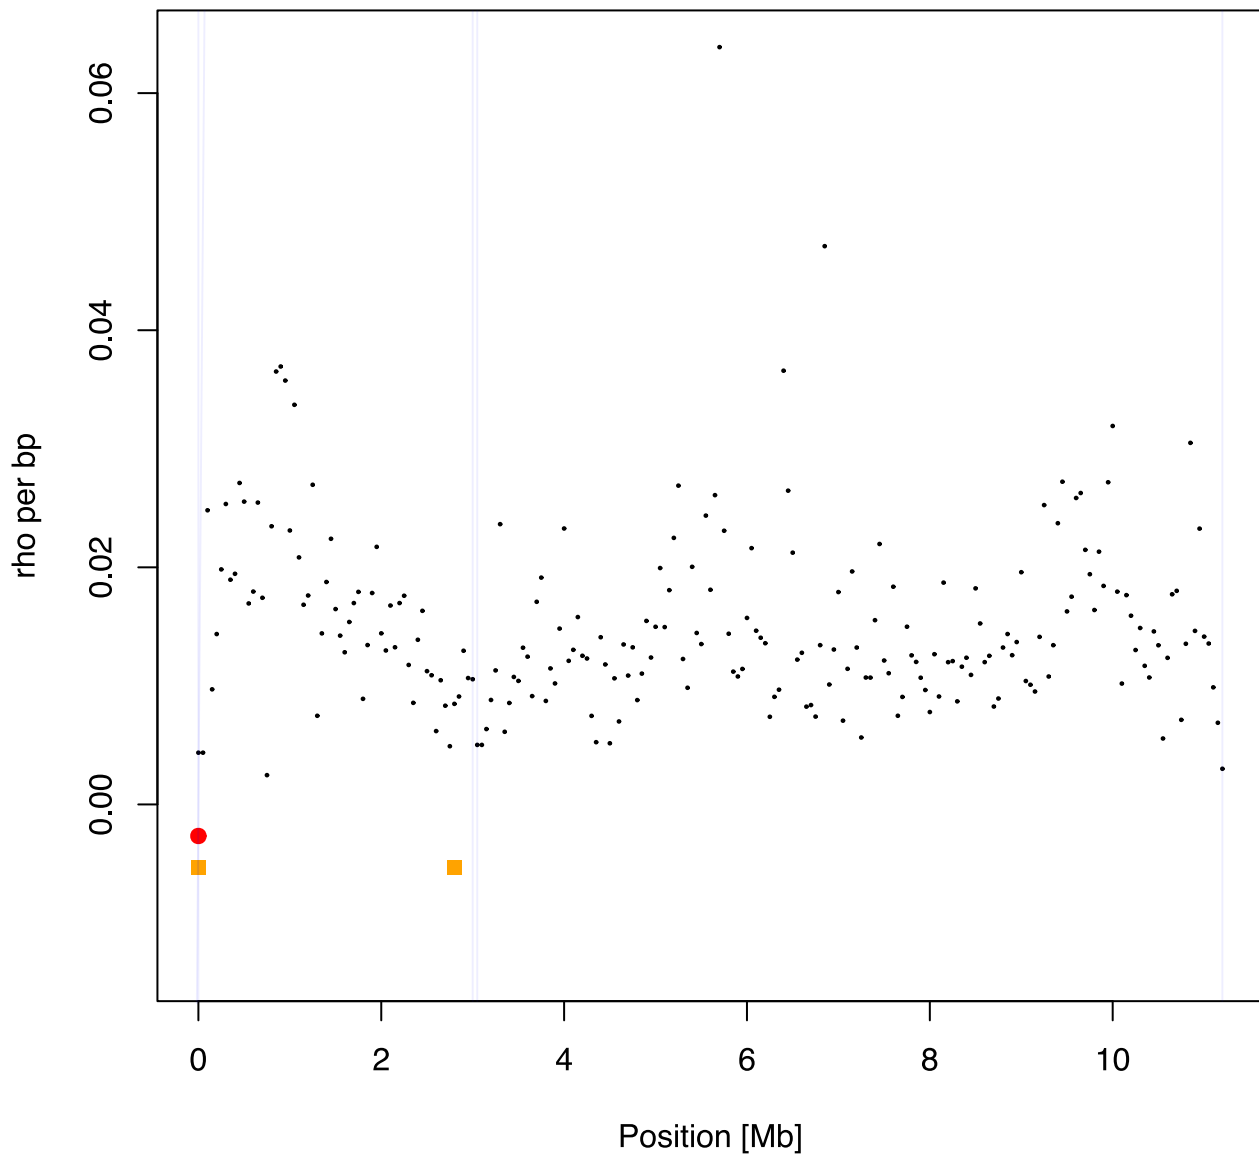

# chr20

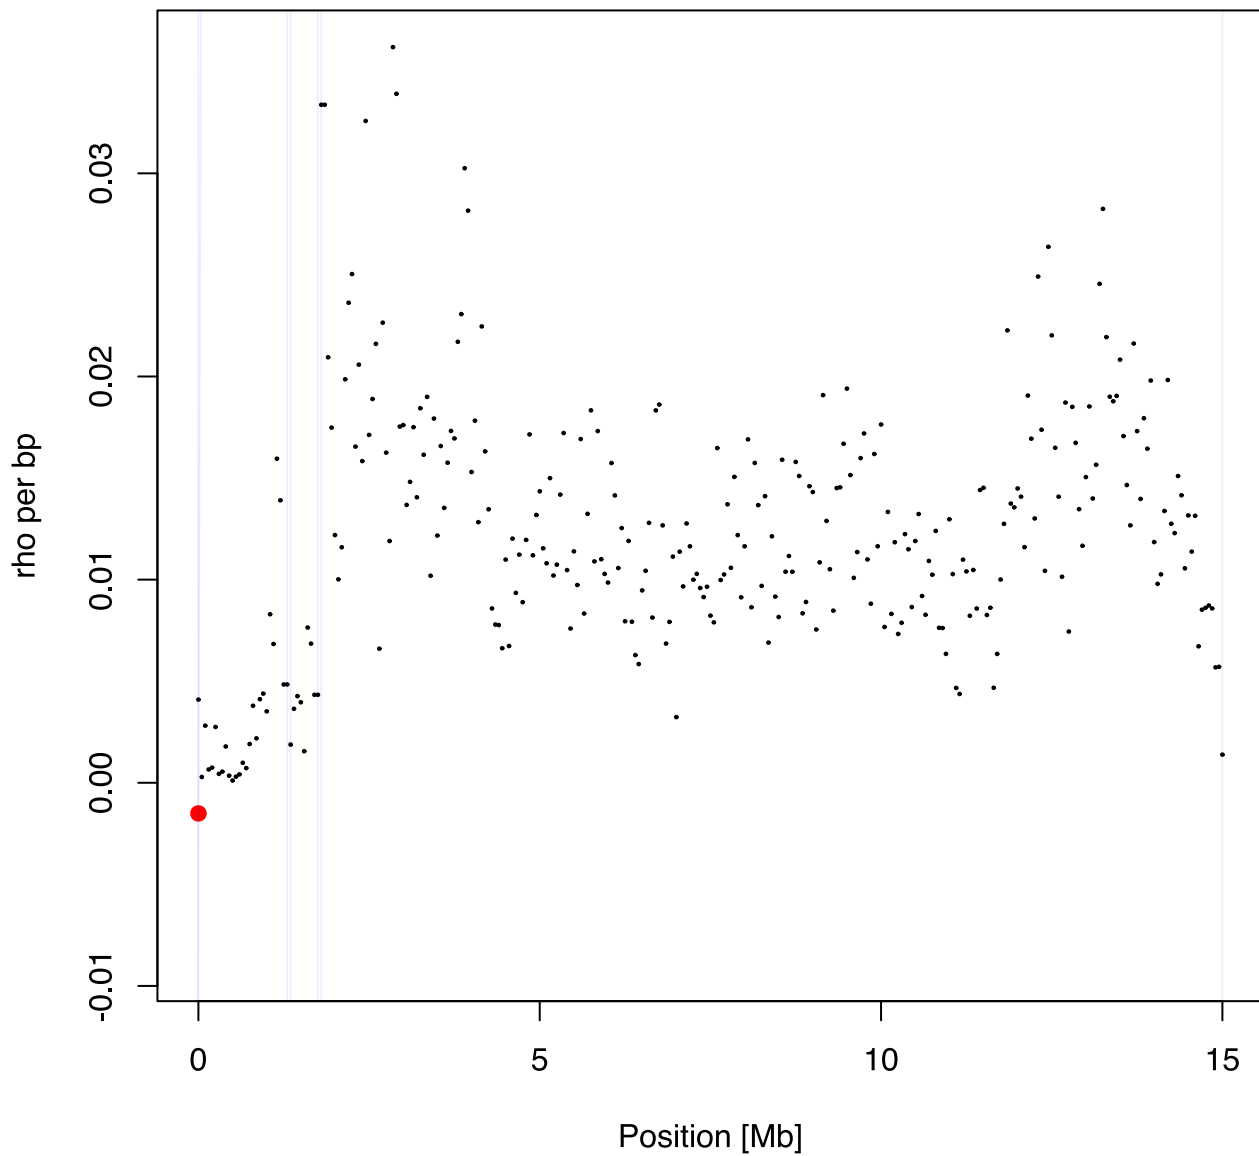

# chr21

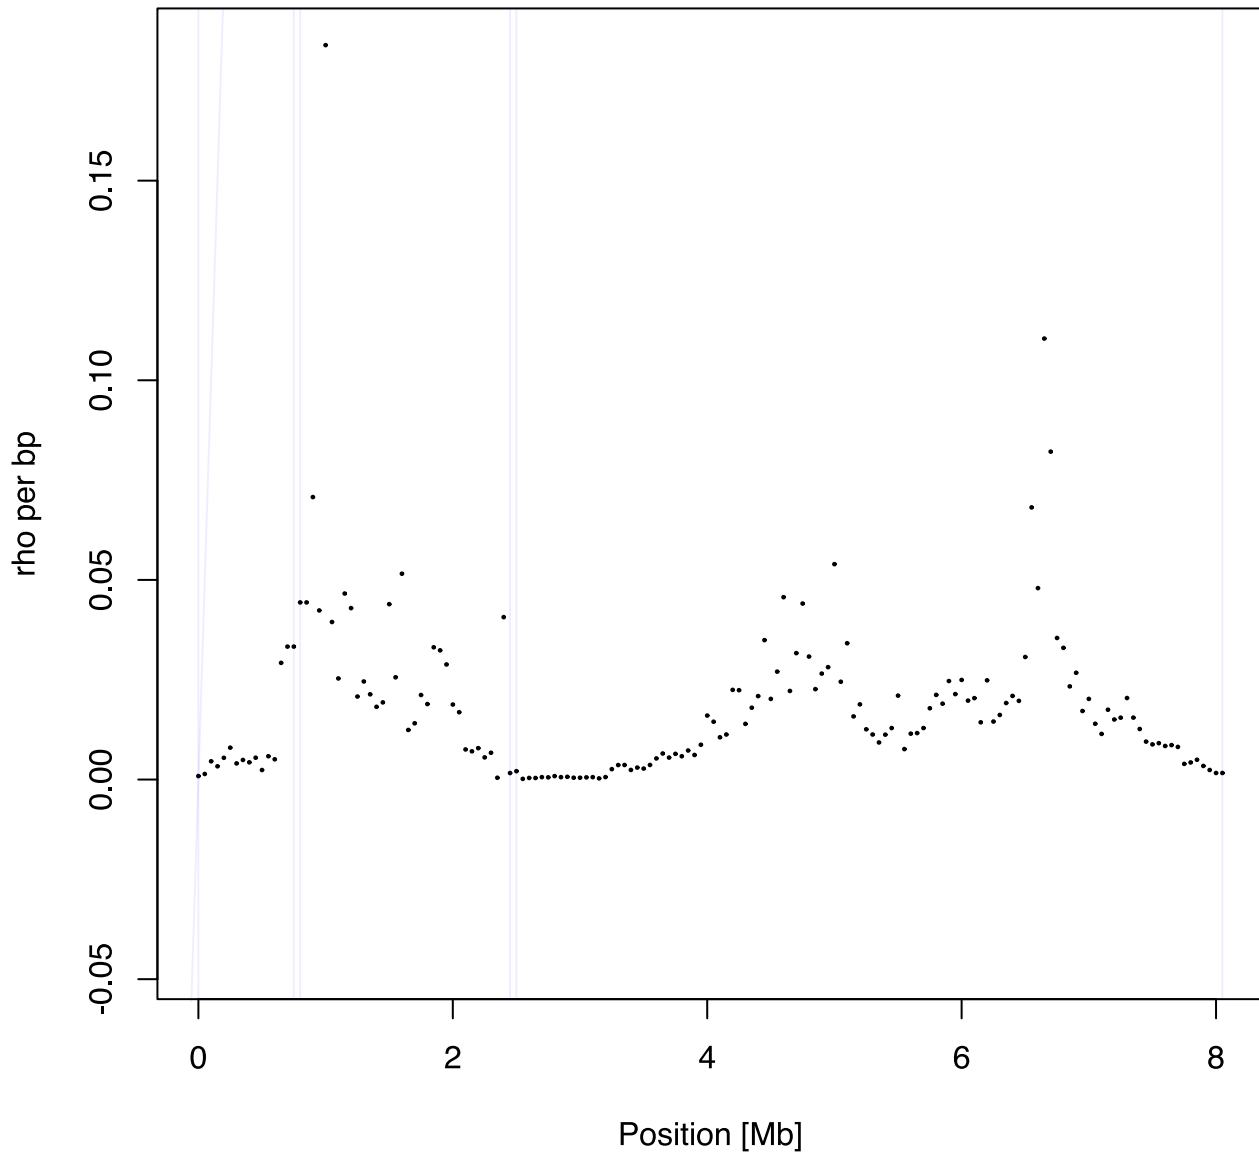

# chr24

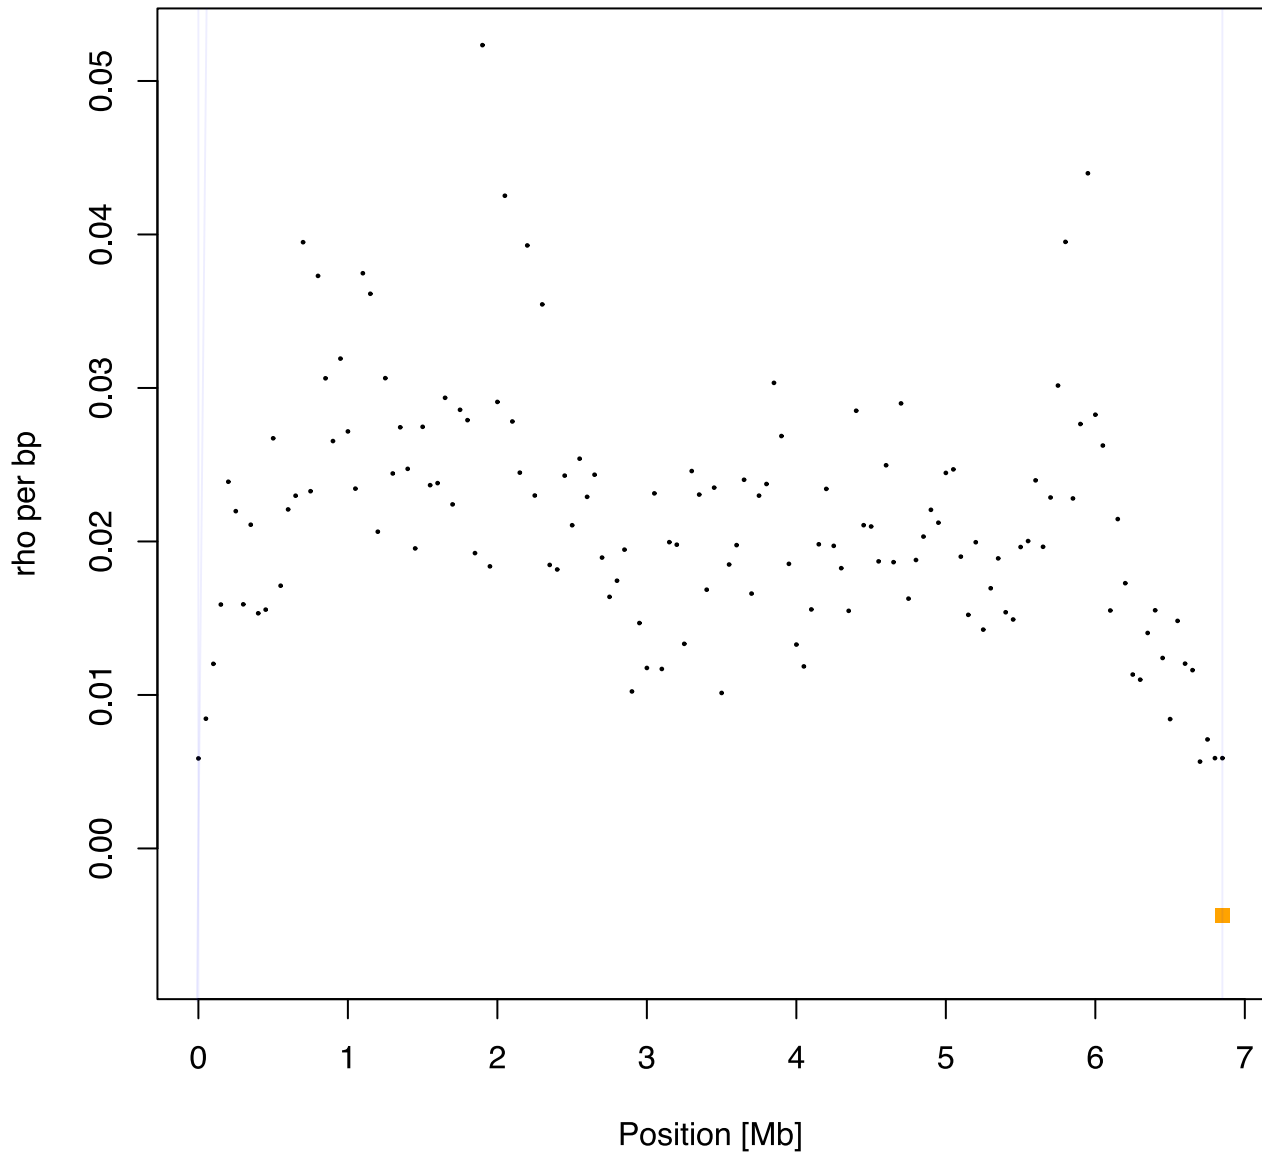

# chr26

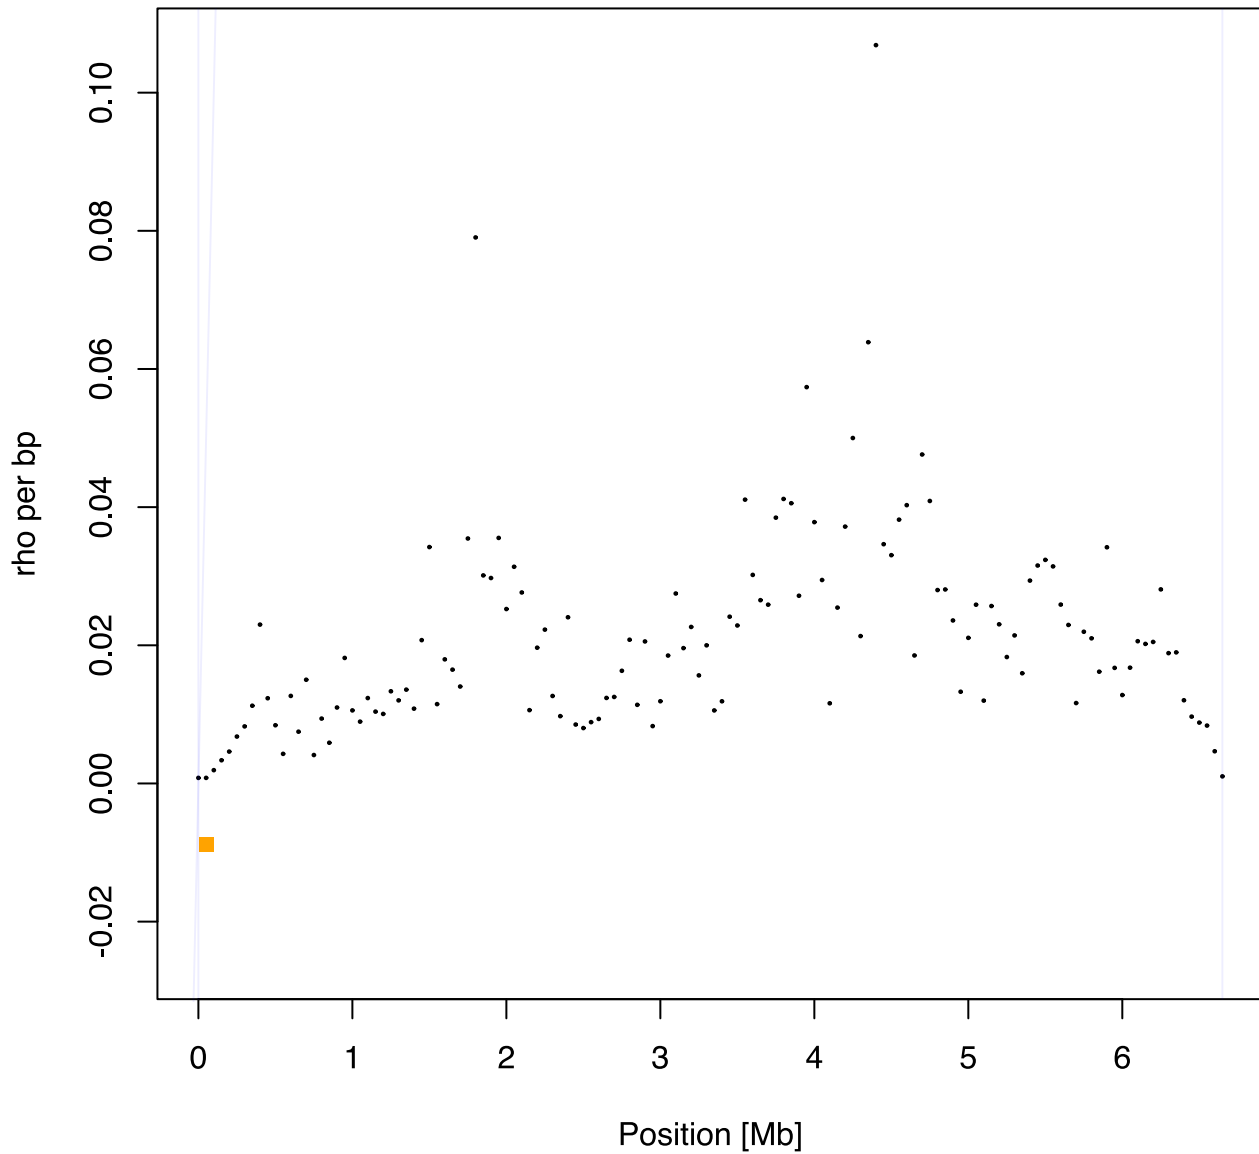

Supplement: supp_gr.215095.116_Supplemental_Fig_S5.pdf [file supp_gr.215095.116_Supplemental_Fig_S5.pdf]
