# Supplementary material for: Combination of short-read, long-read, and optical mapping assemblies reveals large-scale tandem repeat arrays with population genetic implications
Source: PubMed Central journal article supplement — Genome Res. 2017 May;27(5):697–708. doi: 10.1101/gr.215095.116 (PMC5411765; doi:10.1101/gr.215095.116), 2017-05

**Supplemental Figure S1: Example for an artificial inversion in the SR assembly identified by OM alignment.**

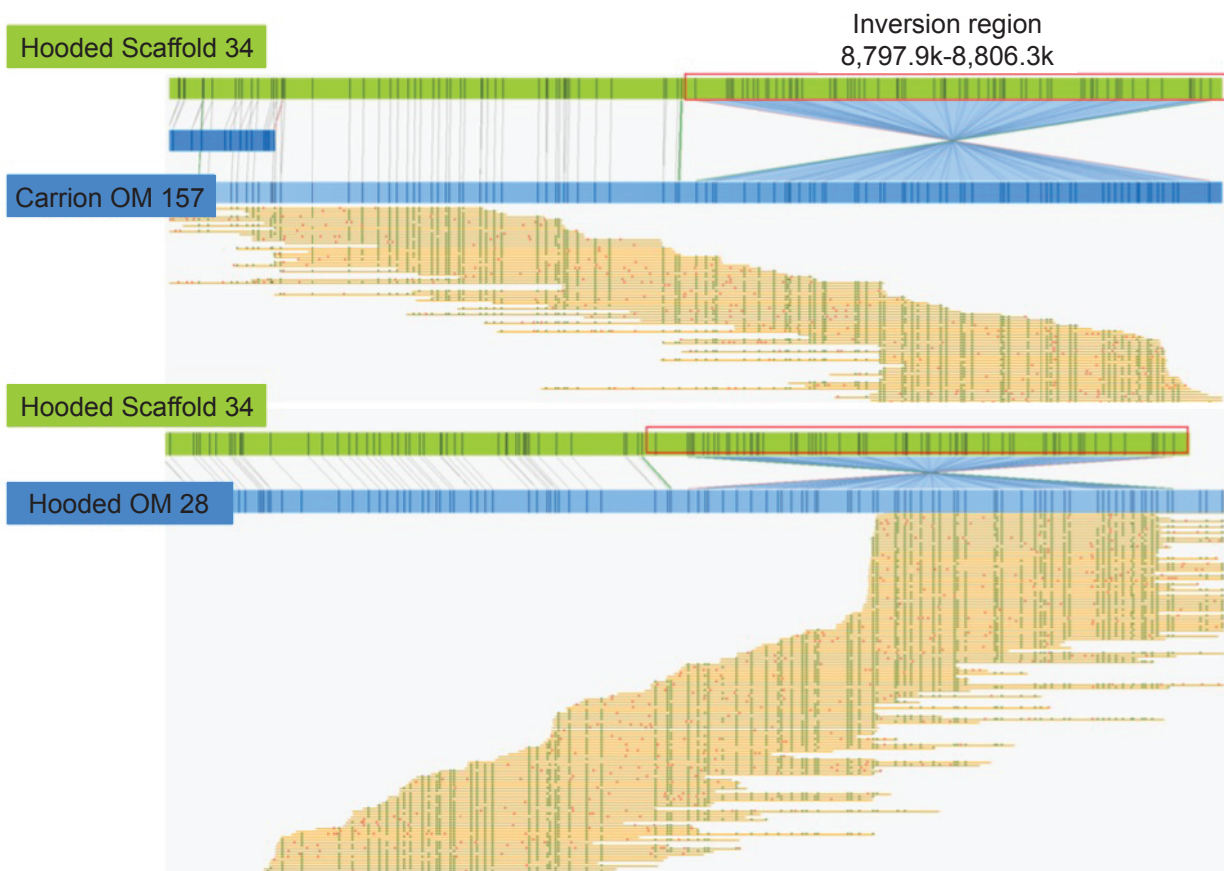

Supplement: supp_gr.215095.116_Supplemental_Fig_S1.pdf [file supp_gr.215095.116_Supplemental_Fig_S1.pdf]
