# Supplementary material for: Combination of short-read, long-read, and optical mapping assemblies reveals large-scale tandem repeat arrays with population genetic implications
Source: PubMed Central journal article supplement — Genome Res. 2017 May;27(5):697–708. doi: 10.1101/gr.215095.116 (PMC5411765; doi:10.1101/gr.215095.116), 2017-05

**Supplemental Figure S2: Large RAMs may not be confidently bridged by single OM molecules and can lead to OM mis-assemblies.** Schematic single-molecule OM pileup with nickase motifs (black vertical lines) only shown within repetitive sequences. Note that the anchoring of individual RAMs to non-repetitive OM contigs is supported by many single molecules spanning the junction.

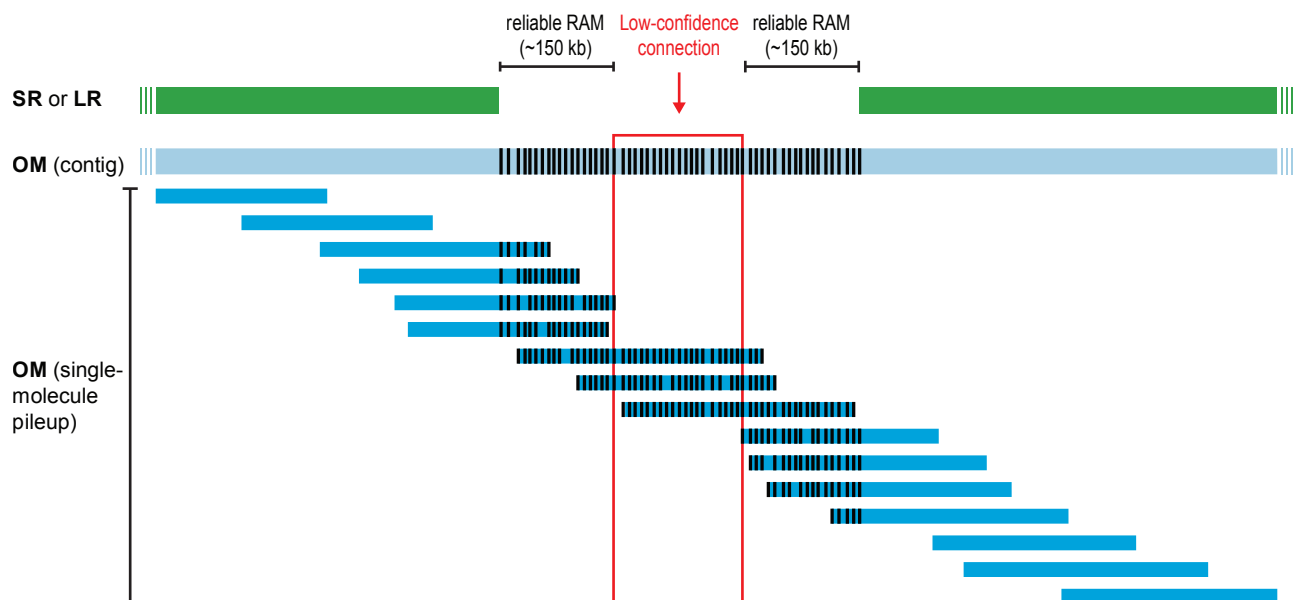

Supplement: supp_gr.215095.116_Supplemental_Fig_S2.pdf [file supp_gr.215095.116_Supplemental_Fig_S2.pdf]
