# Supplementary material for: Combination of short-read, long-read, and optical mapping assemblies reveals large-scale tandem repeat arrays with population genetic implications
Source: PubMed Central journal article supplement — Genome Res. 2017 May;27(5):697–708. doi: 10.1101/gr.215095.116 (PMC5411765; doi:10.1101/gr.215095.116), 2017-05

**Supplemental Figure S3: Example for a RAM alignment away from an LR contig (contig\_000029F) end.** Depicted in green is the *in-silico* reference map based on the LR assembly, the two OM contigs aligned to the reference are blue.

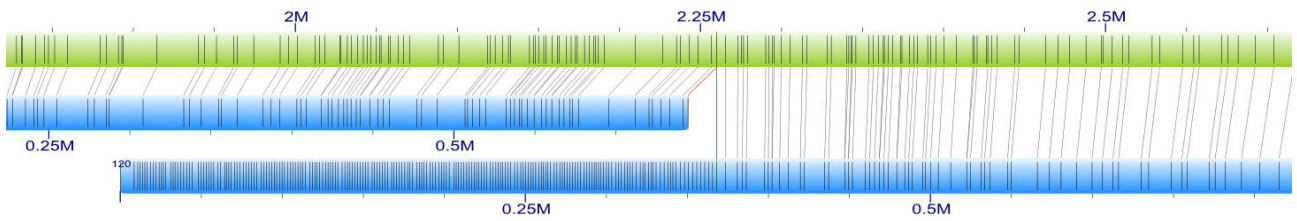

Supplement: supp_gr.215095.116_Supplemental_Fig_S3.pdf [file supp_gr.215095.116_Supplemental_Fig_S3.pdf]
