# Supplementary material for: Combination of short-read, long-read, and optical mapping assemblies reveals large-scale tandem repeat arrays with population genetic implications
Source: PubMed Central journal article supplement — Genome Res. 2017 May;27(5):697–708. doi: 10.1101/gr.215095.116 (PMC5411765; doi:10.1101/gr.215095.116), 2017-05

**Supplemental Figure S4: Sequence similarity plot of a self-alignment of an LR contig (contig\_000396F) entirely consisting of tandemly repeated *crowSat1* subunits.**

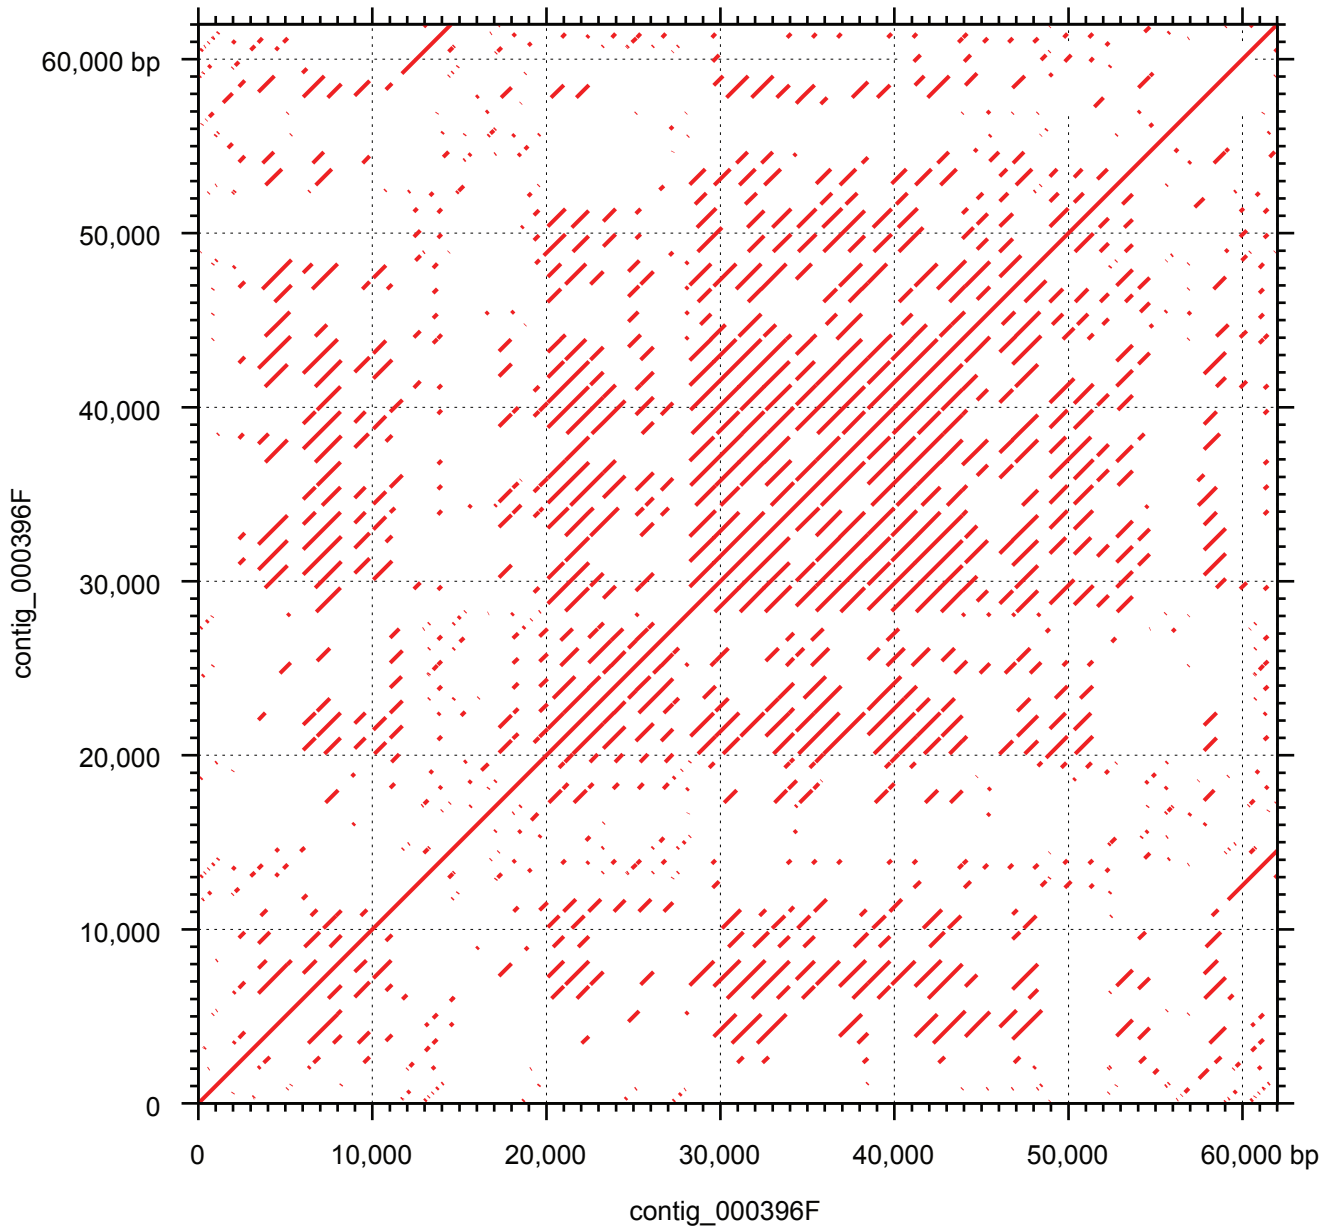

Supplement: supp_gr.215095.116_Supplemental_Fig_S4.pdf [file supp_gr.215095.116_Supplemental_Fig_S4.pdf]
