# Supplementary material for: Combination of short-read, long-read, and optical mapping assemblies reveals large-scale tandem repeat arrays with population genetic implications
Source: PubMed Central journal article supplement — Genome Res. 2017 May;27(5):697–708. doi: 10.1101/gr.215095.116 (PMC5411765; doi:10.1101/gr.215095.116), 2017-05

**Supplemental Figure S7: Mappability and recombination rate  $\rho$ .** Black dots correspond to mean gem-mappability values ( $k$ -mer = 200) derived from 50-kb windows sampled across the genome (top panel), at scaffold ends (second panel), near RAMs (third panel), and near crowSat1 (bottom panel) for hooded (left panels) and carrion crows (right panels). Note that, for better visibility, the range of the y-axis in all plots has been truncated (ranging from 0 – 0.6), which excludes some extreme values.

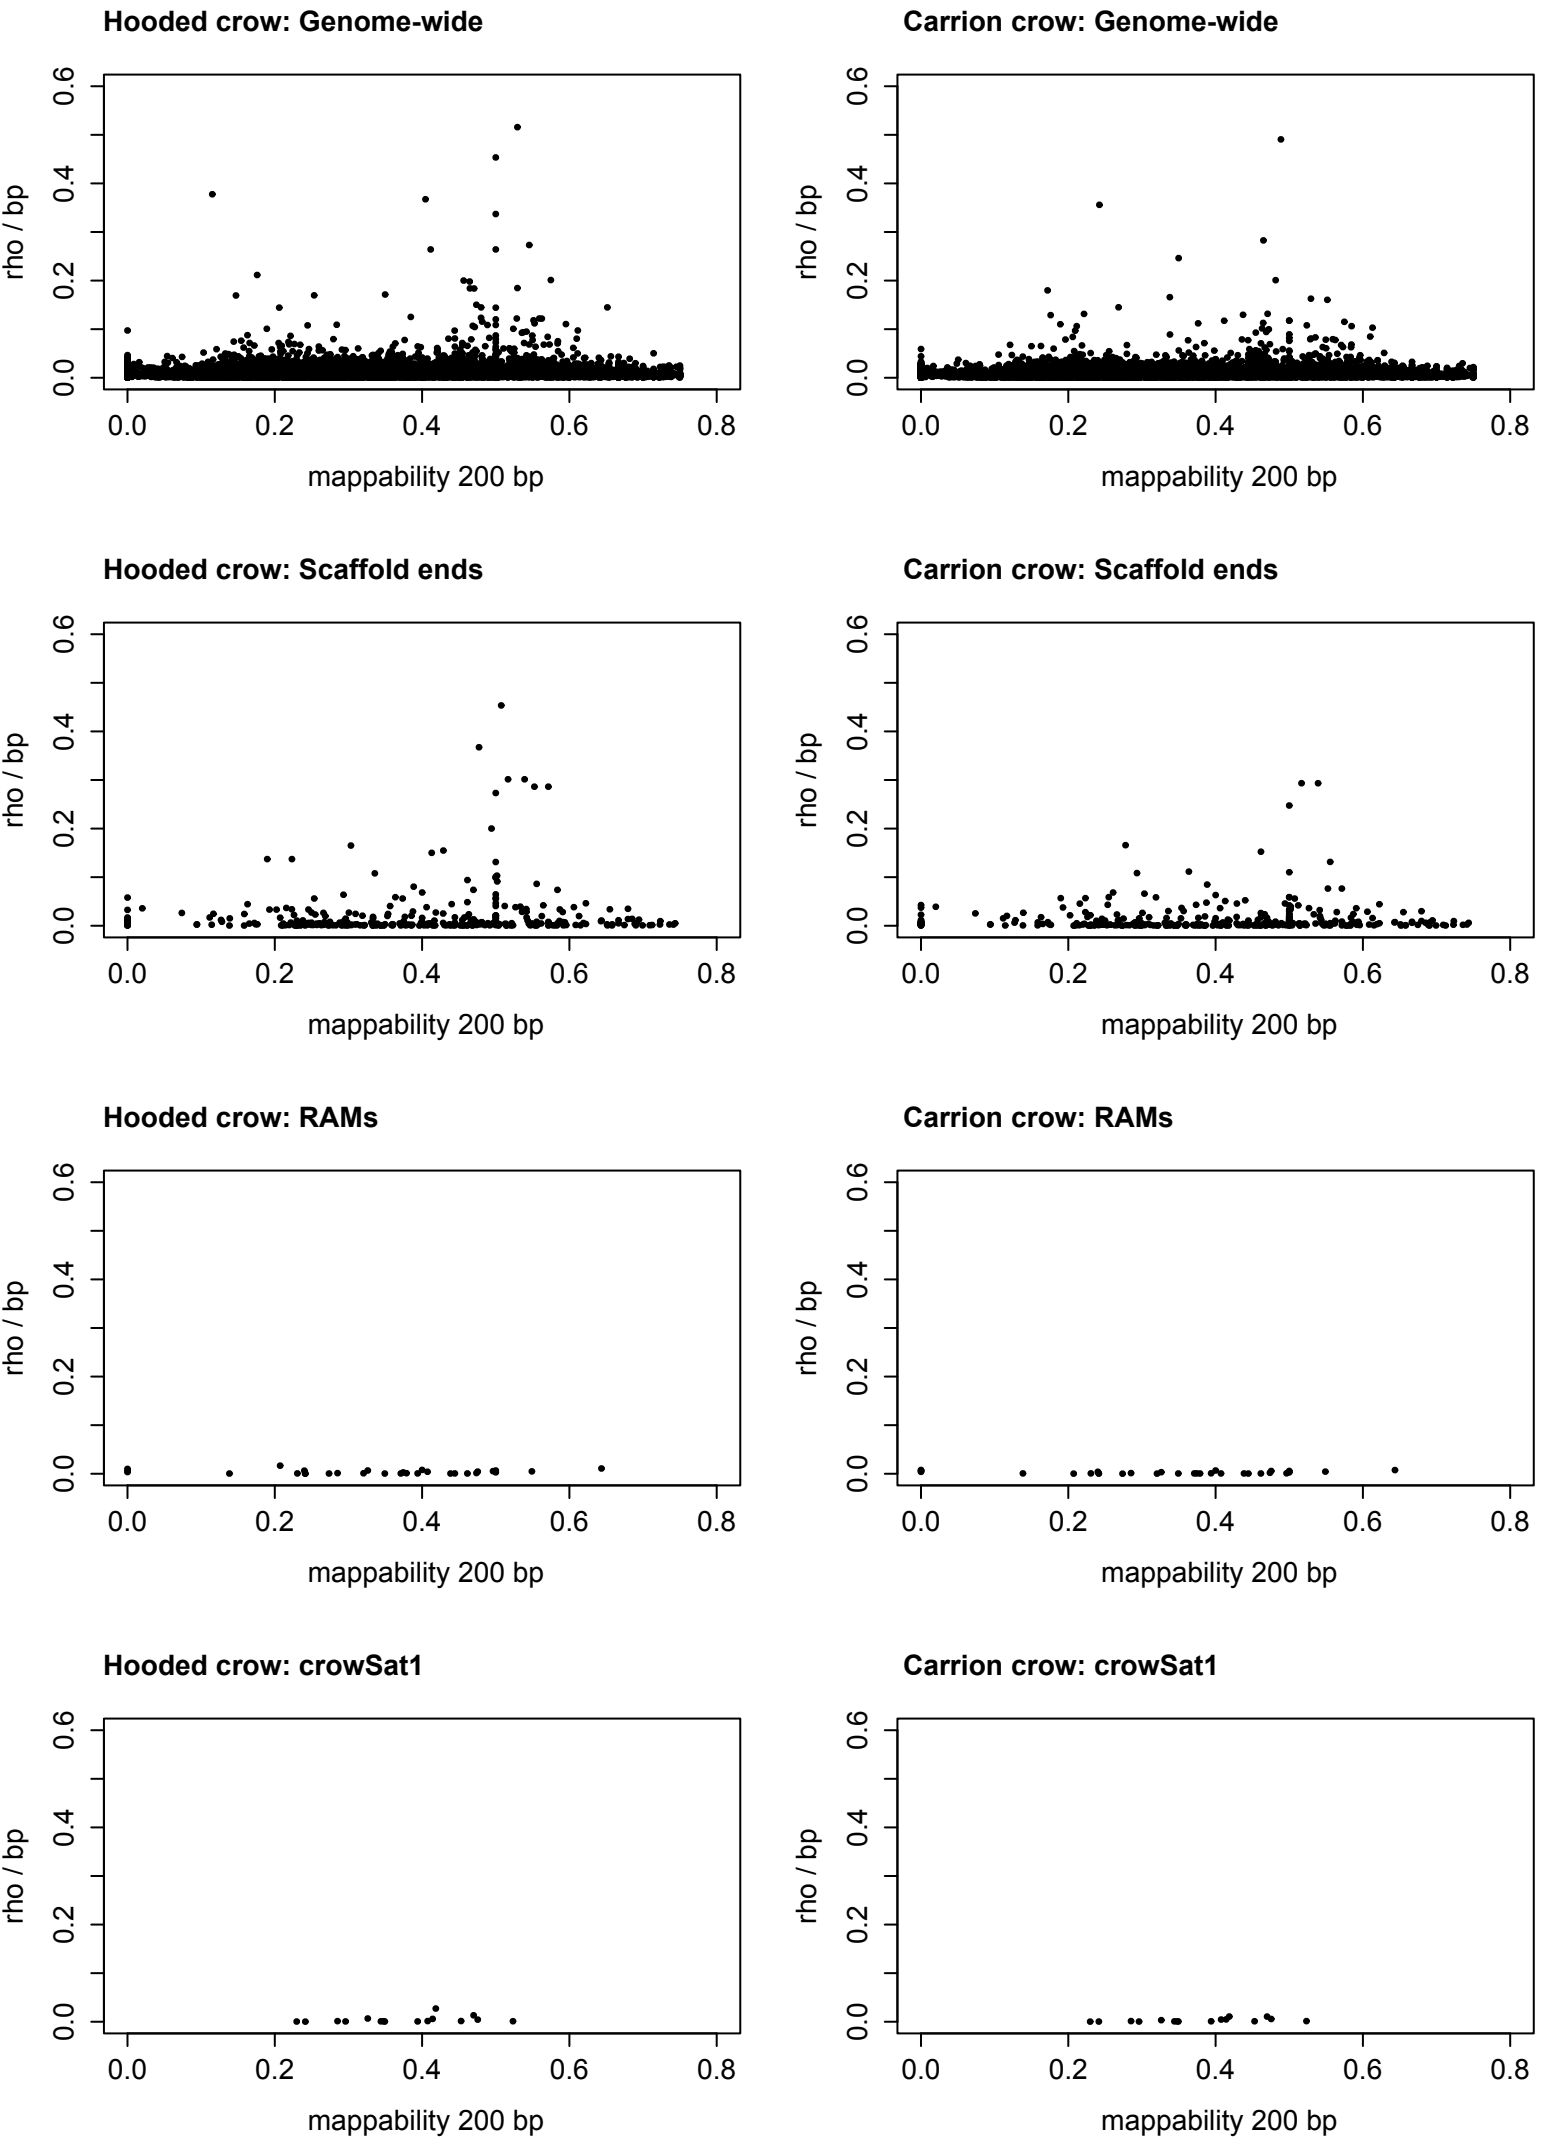

Supplement: supp_gr.215095.116_Supplemental_Fig_S7.pdf [file supp_gr.215095.116_Supplemental_Fig_S7.pdf]
