# Supplementary material for: Combination of short-read, long-read, and optical mapping assemblies reveals large-scale tandem repeat arrays with population genetic implications
Source: PubMed Central journal article supplement — Genome Res. 2017 May;27(5):697–708. doi: 10.1101/gr.215095.116 (PMC5411765; doi:10.1101/gr.215095.116), 2017-05

**Supplemental Figure S8: Recombination rate  $\rho$  in 50-kb and 5-kb windows on chromosome 18 of *carion crow*.** Black dots correspond to the weighted mean of  $\rho$  per bp in 50-kb and 5-kb windows, respectively. Note that, for better comparison, the y-axis on the lower plot (5-kb windows) has the same scale as than the upper (50-kb windows). This excludes some extreme values in the 5-kb plot (ranging from 0.1-4.6).

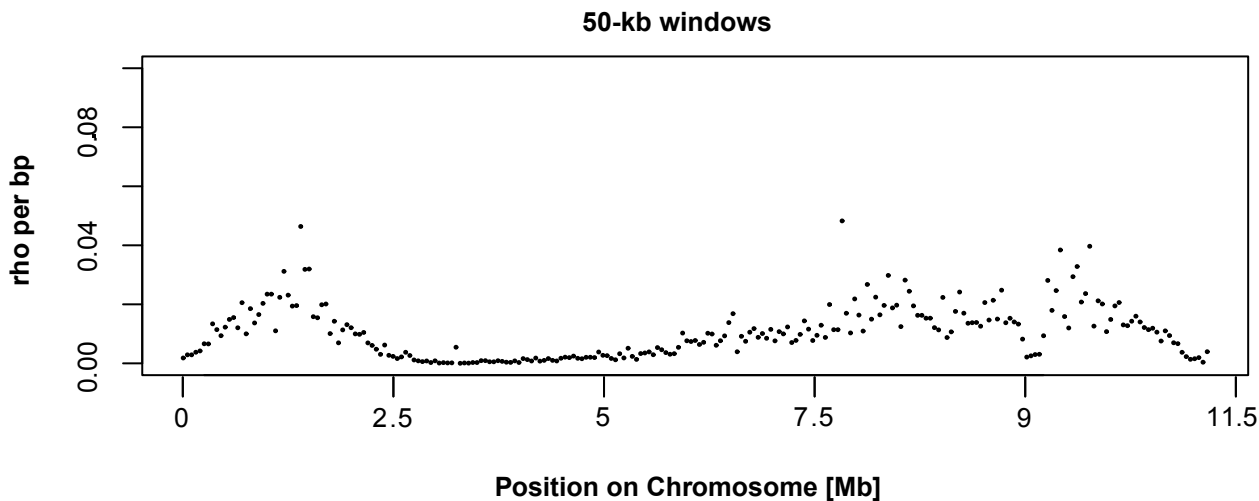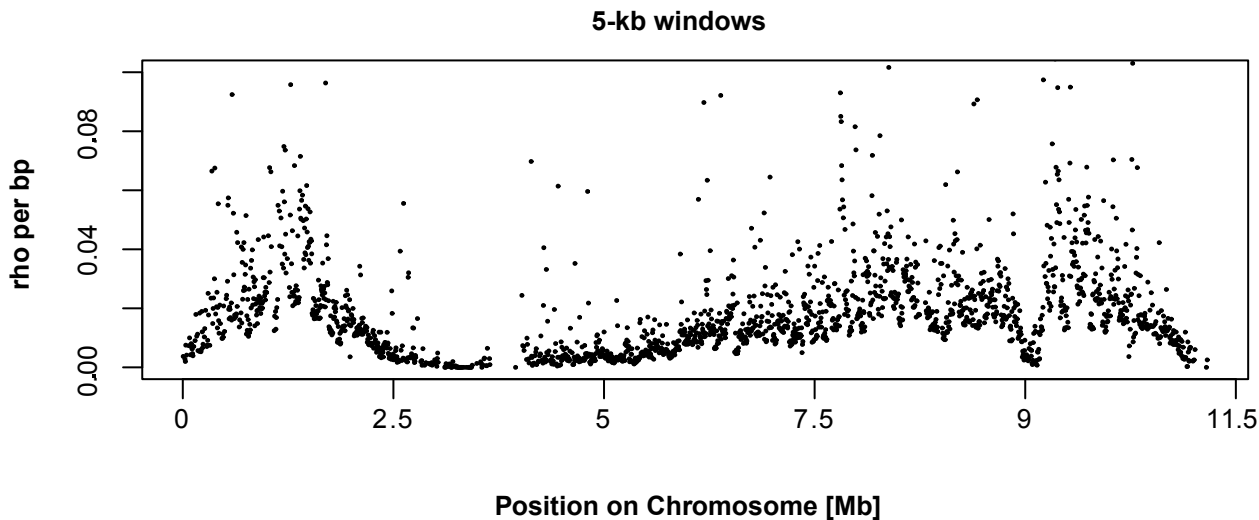

Supplement: supp_gr.215095.116_Supplemental_Fig_S8.pdf [file supp_gr.215095.116_Supplemental_Fig_S8.pdf]
